1 Biotinylated surfome profiling identifies potential  
2 biomarkers for diagnosis and therapy of *Aspergillus*  
3 *fumigatus* infection

4 Lei-Jie Jia<sup>1</sup>, Thomas Krüger<sup>1</sup>, Matthew G. Blango<sup>1</sup>, Olaf Kniemeyer<sup>1,2\*</sup>, Axel A. Brakhage<sup>1,2\*</sup>

5 <sup>1</sup> Department of Molecular and Applied Microbiology, Leibniz Institute for Natural Product  
6 Research and Infection Biology—Hans Knöll Institute, Jena, Germany.

7 <sup>2</sup> Department of Microbiology and Molecular Biology, Institute of Microbiology, Friedrich  
8 Schiller University, Jena, Germany.

9 \*Correspondence:

10 E-mail: olaf.kniemeyer@leibniz-hki.de (OK); axel.brakhage@leibniz-hki.de (AAB)

11 Tel: +49 (0)3641-532 1071 (OK); +49 (0)3641-532 1001 (AAB)

12 ABSTRACT

13 *Aspergillus fumigatus* is one of the most common airborne fungi capable of causing invasive  
14 mycoses in immunocompromised patients and allergic diseases in susceptible individuals. In  
15 both cases, fungal surface proteins mediate the first contact with the human immune system to  
16 evade immune responses or to induce hypersensitivity. Several methods have been established to  
17 study the surface proteome (surfome) of *A. fumigatus*, like trypsin shaving, glucanase treatment,

18 or formic acid extraction. Biotinylation coupled with LC-MS/MS identification of peptides is a  
19 particularly efficient method to identify the surface exposed regions of proteins that potentially  
20 mediate interaction with the host. After biotinylation of surface proteins during spore  
21 germination, we detected 314 different surface proteins, including several well-known proteins  
22 like RodA, CcpA, and DppV, as well as several allergens, heat shock proteins (HSPs), and  
23 previously undescribed surface proteins. Using immunofluorescence microscopy, we confirmed  
24 the surface localization of three HSPs, which may have moonlighting functions. Collectively, our  
25 study generated a comprehensive data set of the *A. fumigatus* surfome, which complements  
26 already existing *A. fumigatus* surface proteome data and allows us to propose a common core set  
27 of *A. fumigatus* surface proteins. In addition, our study uncovers the surface-exposed regions of  
28 many proteins on the surface of spores or hyphae. These surface exposed regions are candidates  
29 for direct interaction with host cells and may represent antigenic epitopes that either induce  
30 protective immune responses or mediate immune evasion. Thus, the comprehensive datasets  
31 provided and compiled here represent reasonable immunotherapy and diagnostic targets for  
32 future investigations.

### 33 HIGHLIGHTS

- 34 • Surface protein biotinylation coupled with LC-MS/MS analysis provides a comprehensive  
35 dataset of the *A. fumigatus* surface proteome.
- 36 • 314 different *A. fumigatus* proteins (including immunoreactive proteins, and virulence  
37 factors) with surface exposed regions were detected.
- 38 • Surface localization of three Hsp70 chaperones was confirmed by protein tagging coupled  
39 with immunofluorescence.

40 • By comparison with other surfome datasets, a core surfome of *A. fumigatus* was defined,  
41 which provides possible biomarkers for diagnosis or therapy.

## 42 SIGNIFICANCE

43 *Aspergillus fumigatus* is the most important airborne human pathogenic mold, capable of  
44 causing both life-threatening invasive pulmonary aspergillosis in immunocompromised patients  
45 and allergic infections in atopic individuals. Despite its obvious medical relevance, timely  
46 diagnosis and efficient antifungal treatment of *A. fumigatus* infection remains a major challenge.  
47 Proteins on the surface of conidia (asexually produced spores) and mycelium directly mediate  
48 host-pathogen interaction and also may serve as targets for diagnosis and immunotherapy.  
49 However, the similarity of protein sequences between *A. fumigatus* and other organisms, and  
50 sometimes even the human host, makes selection of targets for immunological-based studies  
51 difficult. Here, using surface protein biotinylation coupled with LC-MS/MS analysis, we  
52 identified hundreds of *A. fumigatus* surface proteins with exposed regions, further defining  
53 putative targets for possible diagnostic and immunotherapeutic design.

## 54 KEYWORDS

55 *Aspergillus fumigatus*, surface biotinylation, surfome, LC-MS/MS, allergens, heat shock protein.

## 56 1. INTRODUCTION

57 The saprotrophic fungus *Aspergillus fumigatus*, which occurs on decaying organic material, is  
58 associated with a wide spectrum of diseases in humans [1, 2]. The inhalation of *A. fumigatus*  
59 airborne conidia may cause life-threatening invasive pulmonary aspergillosis in

60 immunocompromised patients, chronic pulmonary aspergillosis in immunocompetent patients  
61 with underlying lung diseases, or allergic infections such as allergic bronchopulmonary  
62 aspergillosis (ABPA) in atopic individuals [3, 4]. Despite continuous research and improvements  
63 of diagnostic tools, timely diagnosis of *A. fumigatus* remains a challenge [2]. Detection kits for a  
64 few different recombinant allergens of *A. fumigatus* are now commercially available for the  
65 diagnosis of ABPA, but cross-reactivity with antigens from other microorganisms still makes  
66 diagnosis difficult [5]. In addition to DNA and cell wall polysaccharides, fungal proteins  
67 exposed to the surface may serve as candidate diagnostic markers and valuable targets for new  
68 therapeutics [6, 7].

69         The *A. fumigatus* cell wall not only maintains cellular integrity and protects from external  
70 aggression, but it also serves as a harbor for virulence factors that contribute to immune evasion,  
71 adherence, and virulence [8]. Although the cell wall is composed of <10% proteins [2] and  
72 hundreds of surface proteins have been detected across various proteome studies [9-11], only a  
73 few of these proteins are well characterized, including their roles in *A. fumigatus* virulence.  
74 RodA, which forms the hydrophobic rodlet layer on dormant conidia, is the best-studied conidial  
75 surface protein. RodA is immunologically inert and can mask dectin-1- and dectin-2-dependent  
76 host responses [12, 13]. Despite this important role, a rodletless mutant showed no attenuation in  
77 virulence in a mouse infection model of invasive aspergillosis [14]. Another abundant conidial  
78 surface protein, CcpA, presumably plays a role in maintaining the spore surface structure and  
79 preventing immune recognition. Consequently, it was shown to be essential for virulence in a  
80 corticosteroid immunosuppressed mouse infection model [10]. The *A. fumigatus* protein CalA,  
81 which is present on swollen conidia and germlings, acts as an invasin through interaction with  
82 integrin  $\alpha_5\beta_1$  on host cells and is required for full virulence and lung invasion in corticosteroid-



83 treated mice [15]. Beside these virulence determinants on the conidial surface, many allergens  
84 are also surface exposed. Asp f 2 has been described as a zinc acquiring protein and is one of the  
85 major allergens of *A. fumigatus* [16]. It was found to bind laminin and IgE antibodies from  
86 patients with ABPA [17]. Asp f 2 acts as an immune evasion protein by binding human plasma  
87 regulators, which leads to inhibition of opsonization and damage of human lung epithelial cells  
88 [18]. However, most of the surface exposed proteins are still uncharacterized, and a  
89 comprehensive picture of the *A. fumigatus* surface proteome is lacking, but necessary for a better  
90 understanding of the interaction of *A. fumigatus* conidia with the host.

91         Several proteomic studies have already been performed to define the proteins associated  
92 with the cell surface of *A. fumigatus*. These studies relied on either strong acids like formic or  
93 hydrofluoric acid (HF) or enzymatic treatments with 1,3- $\beta$ -glucanase or trypsin to release surface  
94 proteins for detection [9, 10, 19]. Around 300 common proteins were detected in formic acid  
95 extracts of dormant *A. fumigatus* conidia, while the number significantly increased in *A.*  
96 *fumigatus* mutants lacking either the conidial rodlet-layer or the cell wall polymer,  $\alpha$ -1,3-glucan  
97 [9]. The combined approach of HF-pyridine extraction and trypsin shaving revealed 477  
98 different proteins on dormant or swollen conidia [10], while 178 different proteins were detected  
99 on the surface of *A. fumigatus* conidia during germination using the trypsin shaving approach  
100 [11]. In addition, the trypsin shaving approach also showed that the composition of the conidial  
101 surface proteome is shaped by the sporulation conditions, such as time and temperature [11].

102         All the aforementioned methods efficiently extract surface proteins and/or peptides, but  
103 they also come with drawbacks: they partially disrupt the surface layer and potentially release  
104 cell wall-embedded and cytosolic proteins and peptides in addition to their target cell surface  
105 proteins. Cell surface biotinylation has been shown to yield the lowest rate of contamination by

106 cytoplasmic proteins [20] and provides useful information about the surface-exposed protein  
107 regions.

108 Here, we used a widely applied amine-reactive biotinylation method for surface  
109 proteomics [15, 21, 22], to label the exposed lysine or N-terminal amino acid residues of *A.*  
110 *fumigatus* cell surface proteins. Subsequently, LC-MS/MS analysis was applied to detect  
111 streptavidin-enriched proteins and to define surface-exposed regions based on lysine  
112 modifications. The surface localization of several detected proteins was verified through  
113 immunofluorescence of Myc-tagged transformants of *A. fumigatus*. Our study complements the  
114 picture of the *A. fumigatus* surface proteome and reveals surface proteins that may serve as  
115 detection markers or targets for immunotherapy in the future. Perhaps most importantly, we  
116 identify a number of proteins that are likely directly involved in the interaction of *A. fumigatus*  
117 and the human host.

## 118 2. MATERIALS AND METHODS

### 119 2.1 Fungal strains and cultivation.

120 All strains used in this study are listed in Table S1. *A. fumigatus* CEA10 was cultivated as  
121 described previously [11]. Briefly, the CEA10 strain was inoculated on *Aspergillus* minimal  
122 medium agar plates with 1% (w/v) glucose for 7 days at 37°C. Conidia were harvested in sterile  
123 H<sub>2</sub>O and separated from hyphae and conidiophores by filtering (30 µm, MACS®). For  
124 germination of swollen conidia,  $1 \times 10^{10}$  freshly collected conidia were incubated shaking in 50  
125 mL RPMI 1640 (Lonza) for 5 hours (h) at 37°C.  $1 \times 10^9$  conidia were germinated at the same  
126 condition for 8 h to enrich for germlings, and  $1 \times 10^9$  conidia in 100 mL RPMI 1640 for 14 h to  
127 enrich for hyphae.

128 2.2 Biotinylation of surface proteins.

129 Experiments were performed as described previously with minor modification [22]. Conidia,  
130 germlings, and hyphae were washed three times with PBS (pH 7.4) and then incubated in 5 mL  
131 of PBS containing 5 mg EZ-Link Sulfo-NHS-LC-Biotin (Thermo Fisher Scientific, 21335) for 1  
132 h at 4°C. The reaction was terminated by adding two volumes of 100 mM Tris-HCl, pH 7.4 and  
133 incubated further for 30 min. The samples were then washed another three times with PBS (pH  
134 7.4).

135 2.3 Protein extraction and purification.

136 After adding 1 mL of PBS (pH 7.4) containing protease inhibitor (1 tablet per 10 mL, Roche  
137 cOmplete™, #04693159001) and 500 µL of 0.5 mm diameter glass beads, conidia, germlings,  
138 and hyphae were disrupted using a FastPrep homogenizer with the following settings: 6.5 m/s, 3  
139 times for 30 s. The samples were then centrifuged at 16,000 × g for 10 min at 4°C. The  
140 supernatants were collected and denoted “PBS extracts”. The pellets were washed twice with 1  
141 M NaCl and another three times with 50 mM Tris-HCl, pH 7.4, followed by extraction with SDS  
142 buffer (2% (w/v) SDS, 50 mM Tris-HCl, pH 7.4, 100 mM EDTA, 150 mM NaCl and 40 mM  
143 DTT) for 10 min at 100°C. For purification of the biotinylated proteins, 1 mg of Roti®-  
144 Magbeads Streptavidin (Carl Roth, #HP57.1) were equilibrated by three washes in PBS (pH 7.4),  
145 then incubated with the protein samples for 2 h in a rotating mixer at 4°C. The beads were  
146 washed five times with four different urea buffers (buffer A, 8 M urea, 200 mM NaCl, 2% (w/v)  
147 SDS, 100 mM Tris, pH 8; buffer B, 8 M urea, 1.2 M NaCl, 0.2% (w/v) SDS, 100 mM Tris, pH 8,  
148 10% (w/v) ethanol, 10% (w/v) isopropanol; buffer C, 8 M urea, 200 mM NaCl, 0.2% (w/v) SDS,  
149 100 mM Tris, pH 8, 10% (v/v) ethanol, 10% (v/v) isopropanol; buffer D, 8 M urea, 100 mM Tris,  
150 pH 8) as previously described [22]. Bound proteins were isolated by incubating the streptavidin

151 beads with 170  $\mu$ L of elution buffer (30 mM d-biotin, 8 M urea, 2% (w/v) SDS and 100 mM  
152 Tris, pH 8) for 30 min at 50°C.

153 2.4 Western blot analysis.

154 Proteins were separated by SDS-PAGE using NuPAGE 4–12% (w/v) Bis-Tris gradient gels  
155 (Thermo Fisher Scientific), and then transferred onto a PVDF membrane using the iBlot 2 dry  
156 blotting system (Thermo Fisher Scientific). To detect biotinylated proteins, 5  $\mu$ g of total protein  
157 and 20  $\mu$ L of purified protein were loaded, membranes were blocked with Western Blocking  
158 Reagent (Roche), and then incubated with Pierce® streptavidin-HRP (1:2,000; Thermo Fisher  
159 Scientific, #21130) overnight at 4°C. To detect the Myc-tagged proteins, 10  $\mu$ g of total protein  
160 were loaded, membranes were blocked with a 5% (w/v) solution of skim milk, and then  
161 incubated with primary antibody (1:1,000; Myc-tag mouse mAb, Cell Signaling Technology,  
162 #2276) overnight at 4°C. Hybridization with a secondary antibody (HRP-linked anti-mouse IgG,  
163 Cell Signaling Technology, #7076) was performed for 1 h at room temperature.  
164 Chemiluminescence of HRP substrate was detected with the Fusion FX7 system (Vilber  
165 Lourmat, Germany).

166 2.5 Immunofluorescence microscopy.

167 The fungal materials were washed three times with PBS (pH 7.4) and then blocked with 1%  
168 (w/v) bovine serum albumin (BSA) in PBS for 1h at room temperature. For the detection of  
169 surface biotinylation, *A. fumigatus* conidia, germlings, and hyphae were incubated with Alexa  
170 Fluor™ 635 conjugated streptavidin (1:100; Thermo Fisher Scientific, S32364) for 1 h in the  
171 dark. The surface localization of Myc-tagged proteins, was examined using an anti-Myc primary  
172 antibody (1:100 of Myc-tag mouse mAb, Cell Signaling Technology, #2276) for 2 h at room

173 temperature and a secondary antibody (1:500; Donkey anti-mouse IgG H&L, Alexa Fluor® 568,  
174 Abcam #ab175472) for 1 h at room temperature in the dark. After three times washing with PBS,  
175 the samples were examined under a Zeiss Axio Imager M2 microscope.

## 176 2.6 In-solution protein digest with trypsin

177 150  $\mu$ L of eluted protein samples were reduced by adding 4  $\mu$ L of 500 mM TCEP (tris(2-  
178 carboxyethyl)phosphine in 100 mM TEAB) for 1 h at 55°C. 4  $\mu$ L 625 mM iodoacetamide was  
179 added to each sample and incubated for 30 min at room temperature in the dark. Proteins were  
180 then precipitated using the methanol-chloroform-water method [23]. Protein samples were  
181 resolubilized in 100  $\mu$ L of 100 mM triethylammonium bicarbonate (TEAB) and sonicated for 10  
182 min. Protein content was measured with a Merck Millipore Direct Detect infrared spectrometer.  
183 The samples were treated with trypsin/Lys-C protease mix (Promega, V5072) at a  
184 protease:protein ratio of 1:25 for 16 h at 37°C. The reaction was stopped with 10  $\mu$ L of 10%  
185 (v/v) formic acid and evaporated using a SpeedVac (Thermo Fisher Scientific). Peptides were  
186 resolubilized in 25  $\mu$ L 0.05% (v/v) trifluoroacetic acid (TFA) and 2% (v/v) acetonitrile (ACN) in  
187 water and sonicated for 15 min in a water bath before transfer to a 10 kDa molecular weight cut-  
188 off filter. After 15 min of centrifugation at 14,000  $\times$  g (4°C), the samples were then transferred to  
189 HPLC vials and stored at -20°C.

## 190 2.7 Genetic manipulation of *A. fumigatus*.

191 All oligonucleotides utilized in this study are listed in Table S2. For surface localization studies,  
192 a pLJ-*Ssc70-Myc* construct was generated using pTH1 plasmid [24] as backbone. A 3,276 bp  
193 DNA fragment containing 1,010 bp 5' promoter region, the *ssc70* gene without TAA and an in-  
194 frame fused Myc-tag coding sequence was PCR amplified from genomic DNA using primers

195 Ssc70-M\_F and Ssc70-M\_R. Another 371 bp DNA fragment was amplified from pTH1 plasmid  
196 using primers Myc\_F and pTH\_R. These two fragments were mixed as the template and  
197 amplified using primers Ssc70-M\_F and pTH\_R to generate the *Ssc70-Myc* fragment. *Ssc70-Myc*  
198 fragment was digested with *KpnI* and *NotI*, and then inserted to pTH1 plasmid using T4 ligase  
199 (Thermo Fisher Scientific) to yield the pLJ-*Ssc70-Myc* plasmid. The pLJ-*Ssc70-Myc* plasmid  
200 was then used as the backbone to generate other Myc-tag constructs. For example, a 3,073 bp  
201 DNA fragment containing *hsp70* gene and the promoter region was PCR amplified from  
202 genomic DNA using primers Hsp70-M\_F and Hsp70-M\_R. The DNA fragment was then  
203 inserted into the *KpnI* and *HindIII* digested pLJ-*Ssc70-Myc* backbone using the CloneEZ™ PCR  
204 Cloning Kit (GenScript) to get pLJ-*Hsp70-Myc* plasmid. Primers BipA-M\_F and BipA-M\_R  
205 were used to amplify the *bipA* gene with promoter region. Primers Ssz-M\_F and Ssz-M\_R were  
206 used to amplify the *ssz* gene with promoter region. The plasmids were used to transform  
207 protoplasts from *A. fumigatus* strain A1160 (CEA17  $\DeltaakuB^{KU80}$ ) [25].

## 208 2.8 LC-MS/MS analysis.

209 LC-MS/MS analysis of tryptic peptides was performed on an Ultimate 3000 RSLC nano  
210 instrument coupled to a QExactive HF mass spectrometer (both Thermo Fisher Scientific).  
211 Tryptic peptides were trapped for 4 min on an Acclaim Pep Map 100 column (2 cm × 75  $\mu$ m, 3  
212  $\mu$ m) at a flow-rate of 5  $\mu$ L/min. The peptides were then separated on an Acclaim Pep Map  
213 column (50 cm × 75  $\mu$ m, 2  $\mu$ m) using a binary gradient (A: 0.1% (v/v) formic acid in H<sub>2</sub>O; B:  
214 0.1% (v/v) formic acid in 90:10 (v/v) ACN/H<sub>2</sub>O): 0 min at 4% B, 6 min at 8% B, 30 min at 12%  
215 B, 75 min at 30% B, 85 min at 50% B, 90–95 min at 96% B, 95.1–120 min at 4 % B. Positively  
216 charged ions were generated by a Nanospray Flex Ion Source (Thermo Fisher Scientific) using a  
217 stainless steel emitter with 2.2 kV spray voltage. Ions were measured in data-dependent MS2

218 (Top15) mode: Precursor ions ( $z=2-5$ ) were scanned at  $m/z$  300–1,500 (resolution,  $R$ : 120,000  
219 FWHM; automatic gain control, AGC target:  $3 \cdot 10^6$ ; maximum injection time  $IT_{\max}$ : 120 ms).  
220 Fragment ions generated in the HCD cell at 30% normalized collision energy using  $N_2$  were  
221 scanned ( $R$ : 15,000 FWHM; AGC target:  $2 \cdot 10^5$ ; max. IT: 90 ms) using a dynamic exclusion of  
222 30 s.

223 2.9 Database search and data analysis of trypsin-cleaved surface peptides.

224 The MS/MS data were searched against the *Aspergillus* Genome database (AspGD) of  
225 *Aspergillus* *fumigatus* Af293  
226 ([http://www.aspergillusgenome.org/download/sequence/A\\_fumigatus\\_Af293/current/](http://www.aspergillusgenome.org/download/sequence/A_fumigatus_Af293/current/);  
227 2019/02/03 YYYY/MM/DD) using Proteome Discoverer (PD) 2.2 and the algorithms of Mascot  
228 2.4.1, Sequest HT, and MS Amanda 2.0. Two missed cleavages were allowed for tryptic  
229 peptides. The precursor mass tolerance was set to 10 ppm and the fragment mass tolerance was  
230 set to 0.02 Da. Dynamic modifications were set as oxidation (+15.995 Da) of Met and NHS-LC-  
231 Biotin (+339.162 Da) modification of Lys and the protein N-terminus. The static modification  
232 was set to carbamidomethylation (+57.021 Da) of Cys. One unique rank 1 peptide with a strict  
233 target false discovery (FDR) rate of  $< 1\%$  on both peptide and protein level (compared against a  
234 reverse decoy database) were required for positive protein hits. Protein abundance quantification  
235 was performed by the Minora algorithm of PD2.2 (area under the curve approach).

236 2.10 Data availability

237 The mass spectrometry proteomics data have been deposited to the ProteomeXchange  
238 Consortium *via* the PRIDE [26] partner repository with the dataset identifier PXD018071.

239 3. RESULTS

### 240 3.1 Biotinylation of *A. fumigatus* surface proteins

241 In this study, we sought to expand the repertoire of *A. fumigatus* surface proteins and their  
242 surface-exposed epitopes, which could directly mediate pathogen-host interaction and serve as  
243 targets for diagnosis and therapy. We used the biotinylation reagent sulfosuccinimidyl-6-  
244 (biotinamido)hexanoate (Sulfo-NHS-LC-Biotin) to label the surface-exposed primary amine  
245 residues (*e.g.*, the  $\epsilon$ -amino group of lysine residues) throughout germination of *A. fumigatus*  
246 conidia (Figure 1). The water-soluble and negatively charged Sulfo-NHS-LC-Biotin is one of the  
247 most frequently applied biotinylation reagents, particularly in regard to surface proteomics [21,  
248 22, 27]. Samples were collected from dormant conidia grown at 37°C on AMM agar plates,  
249 swollen conidia (5 h), germlings (8 h), and hyphae (14 h) germinated at 37°C in RPMI liquid  
250 medium as described previously [11]. Although there is a possibility of biotin reagent permeation  
251 into the fungal cells [22], the biotinylation signal was confined mainly to the surface of conidia  
252 and hyphae as observed by immunofluorescence staining against biotinylated proteins (Figure  
253 2A and Figure S1). Due to the high rigidity of the *A. fumigatus* cell wall, the fungal samples  
254 were first disrupted by glass beads in PBS buffer to release loosely attached surface proteins.  
255 This was followed by a second step using SDS buffer extraction to remove non-covalently bound  
256 hydrophobic surface proteins (Figure 1). After purification, the samples were checked by  
257 Western blot for the level of protein biotinylation and recovery from the streptavidin beads  
258 (Figure 2B and Figure S2). Proteins, varying widely in molecular mass were detected,  
259 demonstrating the ability to label a wide range of proteins using this approach. We also observed  
260 biotinylated protein bands in non-biotinylated samples (Figure 2B and Figure S2). Most likely,  
261 these represent the three known biotin-dependent carboxylases in *A. fumigatus*, encoded by  
262 Afu4g07710, Afu2g08670, and Afu5g08910, which each showed high abundance according to



263 the observed peptide spectrum matches (PSM) in our LC-MS/MS analyses (Dataset 1). They are  
 264 easily distinguishable from the NHS-LC-Biotin modification, which adds 339 dalton of mass to  
 265 the modified proteins.

266 **Table 1.** Proteins identified in all stages throughout germination in the streptavidin-enriched  
 267 fractions.

| Protein name | Brief description                                         | AAs | Biotinylation sites  | Detected in the samples <sup>a</sup> |   |   |   |
|--------------|-----------------------------------------------------------|-----|----------------------|--------------------------------------|---|---|---|
| RodA         | Conidial hydrophobin                                      | 159 | K50                  | D                                    | S | G | M |
|              |                                                           |     | K55; K126            | D                                    | S | - | - |
| Tef1         | Putative translation elongation factor EF-1 alpha subunit | 494 | K472                 | D                                    | S | - | M |
|              |                                                           |     | K476                 | D                                    | S | G | - |
|              |                                                           |     | K483                 | D                                    | S | G | M |
|              |                                                           |     | K486                 | -                                    | - | G | - |
|              |                                                           |     | K9                   | -                                    | - | G | M |
|              |                                                           |     | K20                  | D                                    | - | G | M |
|              |                                                           |     | K25                  | -                                    | - | G | - |
| Htb1         | Histone H2B                                               | 140 | K31; K134            | D                                    | S | G | M |
|              |                                                           |     | K60                  | -                                    | - | - | M |
|              |                                                           |     | K99; K130            | D                                    | - | - | - |
|              |                                                           |     | K100                 | D                                    | - | - | M |
| Afu5g10550   | ATP synthase F1, beta subunit                             | 519 | K122                 | D                                    | S | G | M |
|              |                                                           |     | K148                 | -                                    | S | G | - |
|              |                                                           |     | K151                 | -                                    | S | - | - |
| Bgt1         | 1,3-beta-glucanosyltransferase                            | 305 | K338; K392; K473     | -                                    | - | G | - |
|              |                                                           |     | K36                  | -                                    | - | G | - |
| Afu3g00880   | Putative adhesin protein                                  | 219 | K51; K69; K145; K275 | -                                    | S | - | - |
|              |                                                           |     | K125; K141; K304     | D                                    | S | G | M |
| Afu3g00880   | Putative adhesin protein                                  | 219 | K24                  | D                                    | S | G | M |
|              |                                                           |     | K63                  |                                      | S | G | M |

|            |                                                                                                                 |     |                           |   |   |   |   |
|------------|-----------------------------------------------------------------------------------------------------------------|-----|---------------------------|---|---|---|---|
|            |                                                                                                                 |     | K136; K351;<br>K373; K423 | - | - | - | M |
| DppV       | Secreted dipeptidyl-peptidase                                                                                   | 721 | K239; K328                | - | - | G | M |
|            |                                                                                                                 |     | K327                      | - | S | G | M |
|            |                                                                                                                 |     | K702                      | D | - | G | - |
| Bgt2       | Cell wall glucanase                                                                                             | 446 | K139; K231                | - | - | - | M |
|            |                                                                                                                 |     | K225                      | D | S | G | M |
| GldB       | Putative glycerol dehydrogenase                                                                                 | 325 | K268                      | D | S | G | M |
|            |                                                                                                                 |     | K297                      | D | S | - | - |
| ArtA       | 14-3-3 family protein                                                                                           | 261 | N-term                    | D | S | G | M |
| Afu2g02100 | Putative dihydroliipoamide dehydrogenase                                                                        | 513 | K204; K269;<br>K383       | - | - | G | - |
|            |                                                                                                                 |     | K273; K283;<br>K302; K351 | - | - | - | M |
|            |                                                                                                                 |     | K286; K420                | - | - | G | M |
| Afu3g05360 | Has domain(s) with predicted DNA binding, protein heterodimerization activity                                   | 265 | K435                      | D | S | G | M |
|            |                                                                                                                 |     | K9; K76; K77              | - | - | - | M |
|            |                                                                                                                 |     | K14                       | D | - | G | M |
| Afu4g10410 | Putative aspartate aminotransferase                                                                             | 429 | K22                       | D | S | - | M |
|            |                                                                                                                 |     | K38                       | D | - | - | M |
|            |                                                                                                                 |     | K72                       | - | - | G | M |
| Afu5g13450 | Putative triosephosphate isomerase                                                                              | 249 | K85                       | D | S | - | - |
|            |                                                                                                                 |     | K102                      | - | S | - | - |
|            |                                                                                                                 |     | K137                      | D | - | - | - |
| Afu1g16523 | Ortholog(s) have structural constituent of ribosome activity and cytosolic small ribosomal subunit localization | 93  | K216                      | - | - | G | M |
|            |                                                                                                                 |     | K37                       | D | S | G | M |

268 <sup>a</sup> the lysine residues of the protein detected with biotinylation in dormant (D), swollen (S), germinating (G) conidia,  
269 hyphae (M) and not detected (-) are indicated.

## 270 3.2 Identification of constitutively, and stage-specifically, exposed proteins

271 LC-MS/MS analysis resulted in a proteome set consisting of 1139 different *A. fumigatus*

272 proteins, which were detected with at least 2 peptides and/or a PSM value  $\geq 10$ . Approximately

273 28% (314) of the detected proteins had a detectable NHS-LC-Biotin modification when

274 considering all germination conditions (Figure 3A). 77 proteins had a predicted signal peptide  
275 and 22 proteins had at least one transmembrane domain (fungidb.org; [28]). Over the course of  
276 germination, 74 proteins with biotinylation were identified on dormant conidia, 75 on swollen  
277 conidia, 93 on germlings, and 214 on hyphae. Most of the proteins detected with biotin  
278 modifications were found in PBS extracts, only a few (5 to 14) were exclusively found in SDS  
279 extracts (Figure 3A, 3B, and Dataset 1). In accordance with our previous surface proteomics  
280 study based on a trypsin-shaving approach [11], our data confirm the dynamic change of the  
281 surface-exposed proteome of *A. fumigatus* across germination. There were 24, 16, 30, and 146  
282 proteins detected exclusively on dormant, swollen, germinating conidia, and hyphae, respectively  
283 (Figure 3C).

284 Throughout germination, 15 proteins were biotinylated in all four stages (Table 1),  
285 including several already described surface proteins, for example, RodA [12], the translational  
286 elongation factor 1 alpha Tef1 [29], the peptidase DppV [30], the 1,3-beta-glucanosyltransferase  
287 Bgt1[31] and Bgt2 [32], the 14-3-3 protein ArtA [29], and the MedA-regulated, putative adhesin  
288 Afu3g00880 [33]. The biotinylation of RodA K50 was detected in all four stages, while the  
289 biotinylation of K55 and K126 was only detected in dormant and swollen conidia (Table 1). All  
290 lysine residues are localized in  $\alpha$ -helical regions of the protein [9]. RodA also exhibited high  
291 abundance in conidia but not mycelium (Table 2 for top 15). Tef1 was detected mainly in SDS  
292 extracts (Table S3). The biotinylation of Tef1 was detected at sites K472, K476, K483, and K486,  
293 indicating that the C-terminus of Tef1 was exposed on the conidial and mycelial surface.  
294 Somewhat surprisingly, the histone H2B (Htb1, Afu3g05350) seemed to be one of the most  
295 abundant proteins throughout the germination course (Table 1 and 2). The total PSM value of  
296 Htb1 in dormant conidia was even higher than that of RodA (Dataset 1) in contrast to previous

297 studies using different approaches [10]. One possible explanation for this difference is the  
 298 difference in the total number of the modifiable lysines in each protein. There are 23 lysine  
 299 residues in the 140 amino acid residues (AAs) of Htb1, 9 of which were detected with a  
 300 biotinylation modification (Table 1). In contrast, there are only 9 lysine residues present in the  
 301 hydrophobic protein RodA.

302 **Table 2.** LC-MS/MS analysis of highly abundant proteins detected throughout the germination  
 303 course (top 15 of each morphotype).

| Protein                 | Protein Description                              | AAs | Top 15 in developmental stages | Biotinylation sites <sup>a</sup>                                                                                                                                                                   |
|-------------------------|--------------------------------------------------|-----|--------------------------------|----------------------------------------------------------------------------------------------------------------------------------------------------------------------------------------------------|
| Htb1 <sup>b</sup>       | Histone H2B                                      | 140 | D, S, G, M                     | Table 1                                                                                                                                                                                            |
| RodA <sup>b</sup>       | Conidial hydrophobin                             | 159 | D, S, G                        | Table 1                                                                                                                                                                                            |
| Afu5g10550 <sup>b</sup> | ATP synthase F1, beta subunit                    | 519 | D, S, G                        | Table 1                                                                                                                                                                                            |
| UbiA*                   | Ubiquitin                                        | 128 | D, S                           | K6 <sup>s</sup> ; K33 <sup>d,s</sup> ; K48 <sup>d,s</sup>                                                                                                                                          |
| UbiC*                   | Ubiquitin (Afu3g11260), putative                 | 154 | D, S                           | K6 <sup>s</sup> ; K11 <sup>s</sup> ; K33 <sup>d,s</sup> ; K48 <sup>d,s</sup>                                                                                                                       |
| Tef1 <sup>b</sup>       | Translation elongation factor EF-1 alpha subunit | 494 | D, S                           | Table 1                                                                                                                                                                                            |
| Sod1 <sup>b</sup>       | Cu/Zn superoxide dismutase                       | 154 | D, S                           | K43 <sup>d,s,g</sup>                                                                                                                                                                               |
| GpdA <sup>b</sup>       | Glyceraldehyde-3-phosphate dehydrogenase         | 338 | D, S                           | K194 <sup>d,m</sup> ; K215 <sup>d,s,m</sup>                                                                                                                                                        |
| Pil1                    | Cell wall integrity signaling protein            | 345 | D, S                           | K29 <sup>d</sup> ; K45 <sup>d,s</sup> ; K131 <sup>d,s</sup> ; K160 <sup>d,s</sup> ; K270 <sup>d</sup>                                                                                              |
| Afu7g01060              | Cysteine-rich secreted protein                   | 343 | D, S                           | K212 <sup>d,s</sup> ; K224 <sup>d,s</sup>                                                                                                                                                          |
| Afu2g13860              | Histone H4                                       | 142 | D                              | K71 <sup>d,m</sup> ; K117 <sup>m</sup>                                                                                                                                                             |
| Ecm33                   | GPI-anchored cell wall organization protein      | 398 | D                              | K170 <sup>s,m</sup> ; K306 <sup>d</sup> ; K334 <sup>m</sup>                                                                                                                                        |
| Scf1 <sup>b</sup>       | Putative heat shock protein                      | 89  | D                              | K81 <sup>d</sup>                                                                                                                                                                                   |
| Grg1 <sup>b</sup>       | Glucose-repressible gene                         | 69  | D                              | K28 or K32 <sup>s</sup> ; K32 <sup>d</sup> ; K46 <sup>d,s</sup>                                                                                                                                    |
| ConJ <sup>b</sup>       | Conidiation-specific protein                     | 83  | D                              | N-Term <sup>d</sup> ; K48 <sup>d</sup>                                                                                                                                                             |
| CatA                    | Spore-specific catalase                          | 750 | D                              | K534 <sup>d</sup> ; K534 or K537 <sup>s</sup> ; K537 <sup>d</sup> ; K608 or K612 <sup>s</sup>                                                                                                      |
| CpcB                    | G-protein complex beta subunit                   | 316 | S, G                           | K38 <sup>s</sup> ; K56 <sup>d,s,g</sup> ; K172 <sup>s</sup> ; K277 <sup>s,g</sup>                                                                                                                  |
| Asp f MDH <sup>b</sup>  | Putative NAD-dependent malate dehydrogenase      | 340 | S, G                           | K91 <sup>s</sup> ; K185 or K186 <sup>m</sup> ; K238 <sup>s,g,m</sup> ; K263 <sup>s,g,m</sup> ; K269 <sup>s</sup> ; K303 <sup>s</sup> ; K309 <sup>s,m</sup> ; K327 <sup>m</sup> ; K331 <sup>m</sup> |
| Afu8g05320 <sup>b</sup> | Putative mitochondrial F1 ATPase subunit alpha   | 556 | S, G                           | K135s; K164g; K170g, m; K170 or K172s; K233g; K243g; K427g, m; K430g; K531g                                                                                                                        |

|                         |                                               |      |      |                                                                                                                                                                                                                                  |
|-------------------------|-----------------------------------------------|------|------|----------------------------------------------------------------------------------------------------------------------------------------------------------------------------------------------------------------------------------|
| Afu1g04070              | Eukaryotic initiation factor 5A               | 157  | S    | K40 <sup>§</sup> ; K69 <sup>§</sup>                                                                                                                                                                                              |
| RodB                    | Conidial cell wall hydrophobin                | 183  | S    | K105 <sup>§</sup>                                                                                                                                                                                                                |
| Bgt1                    | Putative 1,3-beta-glucanoyltransferase        | 305  | S    | Table 1                                                                                                                                                                                                                          |
| Afu3g00880              | Putative adhesin protein                      | 219  | G, M | Table 1                                                                                                                                                                                                                          |
| Afu4g07710              | Putative pyruvate carboxylase                 | 1193 | G, M | K571 <sup>m</sup> ; K684 <sup>m</sup> ; K1004 <sup>m</sup> ; K1157 <sup>§</sup>                                                                                                                                                  |
| Afu6g13250 <sup>b</sup> | 60S ribosomal protein L31e                    | 123  | G, M | K30 <sup>m</sup> ; K59 <sup>m</sup> ; K69 <sup>m</sup> ; K70 <sup>§</sup> ; K111 <sup>§</sup>                                                                                                                                    |
| Sod3/Asp f 6            | Manganese superoxide dismutase                | 210  | G    | K50 <sup>§</sup> ; K59 <sup>§</sup> ; K88 <sup>§-m</sup> ; K93 <sup>§-m</sup> ; K101 <sup>§</sup> ; K202 <sup>m</sup>                                                                                                            |
| Hsp70 <sup>b</sup>      | Heat shock protein                            | 638  | G    | K54 <sup>m</sup> ; K185 <sup>§</sup> ; K244 <sup>m</sup> ; K249 <sup>§-m</sup> ; K421 <sup>§</sup> ; K449 <sup>m</sup> ; K498 <sup>§-m</sup> ; K505 <sup>§-m</sup> ; K510 <sup>§-m</sup> ; K522 <sup>§</sup> ; K555 <sup>m</sup> |
| PgkA <sup>b</sup>       | Putative phosphoglycerate kinase              | 417  | G    | K32 <sup>§</sup> ; K33 <sup>§</sup> ; K79 <sup>§</sup> ; K246 <sup>§</sup> ; K264 <sup>§</sup>                                                                                                                                   |
| Afu3g12300              | 60S ribosomal protein L22                     | 124  | G    | K17 <sup>§</sup>                                                                                                                                                                                                                 |
| Afu4g04460              | 60S ribosomal protein L13                     | 226  | G    | K225 <sup>§</sup> ; K226 <sup>d</sup>                                                                                                                                                                                            |
| Ndk1                    | Putative nucleoside diphosphate kinase        | 153  | G    | K84 <sup>§-m</sup>                                                                                                                                                                                                               |
| Asp f 4                 | Allergen Asp f 4                              | 322  | M    | K140 <sup>§-m</sup> ; K155 or 156 <sup>m</sup> ; K220 <sup>m</sup> ; K306 <sup>m</sup>                                                                                                                                           |
| Afu2g09200              | 60S ribosomal protein L30                     | 106  | M    | K34 <sup>m</sup>                                                                                                                                                                                                                 |
| Afu1g11130              | 60S ribosomal protein L6                      | 200  | M    | K107 <sup>m</sup>                                                                                                                                                                                                                |
| Afu1g05390              | ATP:ADP antiporter activity                   | 308  | M    | K103 <sup>m</sup> ; K146 <sup>§-m</sup> ; K149 <sup>m</sup> ; K252 <sup>m</sup> ; K264 <sup>m</sup>                                                                                                                              |
| Afu3g06840              | Cytosolic small ribosomal subunit S4          | 261  | M    | K106 <sup>m</sup>                                                                                                                                                                                                                |
| Afu3g06960              | 60S ribosomal protein L21                     | 158  | M    | K20 <sup>m</sup> ; K107 <sup>m</sup> ; K110 <sup>m</sup>                                                                                                                                                                         |
| GliT                    | Gliotoxin sulfhydryl oxidase                  | 334  | M    | K117 <sup>m</sup> ; K227 <sup>m</sup>                                                                                                                                                                                            |
| Gel2/Asp f GT           | GPI-anchored 1,3-beta-glucanoyltransferase    | 475  | M    | K36 <sup>m</sup> ; K187 <sup>m</sup> ; K372 <sup>m</sup> ; K379 <sup>§-m</sup> ; K388 <sup>m</sup> ; K393 <sup>m</sup>                                                                                                           |
| Afu6g12990 <sup>b</sup> | Cytosolic large ribosomal subunit protein L7A | 263  | M    | K8 <sup>m</sup> ; K212 <sup>m</sup> ; K229 <sup>m</sup> ; K255 <sup>§</sup>                                                                                                                                                      |
| BtgE                    | Putative cell wall glucanase                  | 616  | M    | K376 <sup>m</sup> ; K387 <sup>m</sup> ; K389 <sup>m</sup> ; K577 <sup>§-m</sup>                                                                                                                                                  |
| Afu4g07730              | 60S ribosomal protein L11                     | 176  | M    | K79 <sup>m</sup> ; K91 <sup>m</sup> ; K157 <sup>m</sup>                                                                                                                                                                          |

304 <sup>a</sup> Lysine residues of the protein detected with biotinylation marks in dormant (<sup>d</sup>), swollen (<sup>§</sup>), germinating (<sup>§</sup>) conidia  
 305 and hyphae (<sup>m</sup>) are indicated. <sup>b</sup> Proteins commonly detected in different surface proteomics data, see also Table S3.

306 \* have shared peptides mapped to different proteins.

307 3.3 Immunoreactive proteins are exposed on the surface of *A. fumigatus*

308 In a unique subset of atopic individuals, sensitization to *A. fumigatus* allergens can develop into

309 allergic asthma, allergic sinusitis, and following fungal lung colonization into ABPA [2].

310 Twenty-three different allergens have been reported in accordance to the systematic allergen

311 nomenclature ([www.allergome.org](http://www.allergome.org)), but actually more than 100 immunoreactive *A. fumigatus*  
312 proteins have already been detected by immunoproteomic studies [5]. In our work, 22 allergens  
313 (Table 3) were detected by surface biotinylation. The allergens Asp f 17, Asp f 18, Asp f 27, Asp  
314 f Mannosidase, Asp f Catalase, and Asp f Glucosidase were detected on dormant conidia. The  
315 biotinylation of Asp f 27 K140 was detected on dormant, swollen, and germinating conidia. In  
316 addition to Asp f 27, three allergens (Asp f 9, Asp f FDH, and Asp f MDH) were detected on  
317 swollen conidia, germlings, and hyphae. Biotinylation of Asp f 9 K190, Asp f MDH K238, and  
318 K263 were detected on the three different morphologies of *A. fumigatus*. Ten allergens were only  
319 detected on germlings and/or hyphae (Table 3). Consistent with the literature, these data again  
320 clearly demonstrate that numerous known *A. fumigatus* allergens are exposed on the fungal  
321 surface [9-11, 18, 34].

322 In addition to the allergens, there were also other immunoreactive proteins that could  
323 serve as biomarkers for diagnosis or targets for allergen immunotherapy [35-37]. DppV, Bgt1,  
324 Bgt2, and Afu5g10550 were detected with biotinylation modifications in all four morphotypes  
325 (Table 1). Afu5g10550 encodes an ATP synthase F1 beta subunit, which reacts with immunosera  
326 from rabbits exposed to *A. fumigatus* conidia [35]. Biotinylation of Afu5g10550 K122 was  
327 detected throughout germination. It was also one of the most prevalent proteins detected on  
328 dormant, swollen, and germinating conidia (Table 1 and 2). The immunoreactive GpdA, Asp f  
329 MDH, Bgt1, Asp f 6, PgkA, Asp f 4, GliT, Asp f GT, and Hsp70 were also prevalent on the  
330 surface of one or two morphological stages (Table 2).

331 **Table 3.** *A. fumigatus* allergens exposed to the surface.

| Allergen <sup>a</sup> | Protein Description | AAs | Detected<br>in the<br>samples | Biotinylation sites |
|-----------------------|---------------------|-----|-------------------------------|---------------------|
|-----------------------|---------------------|-----|-------------------------------|---------------------|

|                                        |                                              |     |         |                                                                                                                                                                                                         |
|----------------------------------------|----------------------------------------------|-----|---------|---------------------------------------------------------------------------------------------------------------------------------------------------------------------------------------------------------|
| Asp f 1                                | Mitogillin                                   | 176 | G, M    | K96 <sup>g, m</sup> ; K138 <sup>g</sup> ; K140 <sup>g</sup>                                                                                                                                             |
| Asp f 2                                | Allergen Asp f 2                             | 314 | M       | K83 <sup>m</sup>                                                                                                                                                                                        |
| Asp f 4                                | Allergen Asp f 4                             | 322 | S, M    | K140 <sup>s, m</sup> ; K155 or 156 <sup>m</sup> ; K220 <sup>m</sup> ; K306 <sup>m</sup>                                                                                                                 |
| Asp f 6 (Sod3)                         | Putative manganese superoxide dismutase      | 210 | G, M    | K50 <sup>g</sup> ; K59 <sup>g</sup> ; K88 <sup>g, m</sup> ; K93 <sup>g, m</sup> ; K101 <sup>g</sup> ; K202 <sup>m</sup>                                                                                 |
| Asp f 9                                | Cell wall glucanase                          | 395 | S, M, G | K190 <sup>s, g, m</sup>                                                                                                                                                                                 |
| Asp f 11 (Cyp4)                        | Putative cyclophilin                         | 205 | S       | K119 <sup>s</sup>                                                                                                                                                                                       |
| Asp f 12 (Hsp90)                       | Heat shock protein                           | 706 | G       | K481 <sup>g</sup>                                                                                                                                                                                       |
| Asp f 17 (Mp1) <sup>b</sup>            | Putative cell wall galactomannoprotein       | 284 | D       | K63 <sup>d</sup> ; K144 <sup>d</sup>                                                                                                                                                                    |
| Asp f 18 (Alp2)                        | Autophagic (vacuolar) serine protease        | 495 | D       | K261 <sup>d</sup> ; K268 <sup>d</sup> ; K271 <sup>d</sup> ; K291 <sup>d</sup>                                                                                                                           |
| Asp f 23 (RpL3)                        | Allergenic ribosomal L3 protein              | 392 | M       | K5 <sup>m</sup>                                                                                                                                                                                         |
| Asp f 27 <sup>b</sup>                  | Putative peptidyl-prolyl cis-trans isomerase | 163 | D, S, G | K43 <sup>d, s</sup> ; K140 <sup>d, s, g</sup> ; K152 or K153 <sup>d</sup>                                                                                                                               |
| Asp f 28 <sup>b</sup>                  | Putative thioredoxin                         | 171 | M       | K125 <sup>m</sup>                                                                                                                                                                                       |
| Asp f Mannosidase (MsdS) <sup>b</sup>  | Putative 1,2-alpha-mannosidase               | 503 | D       | K212 <sup>d</sup> ; K274 <sup>d</sup> ; K415 <sup>d</sup> ; K416 <sup>d</sup> ; K488 <sup>d</sup>                                                                                                       |
| Asp f Catalase (Cat1) <sup>b</sup>     | Catalase                                     | 728 | D       | K261 <sup>d</sup> ; K346 <sup>d</sup> ; K466 <sup>d</sup>                                                                                                                                               |
| Asp f Glucosidase (Exg12) <sup>b</sup> | Secreted beta-glucosidase                    | 863 | D, M    | K127 <sup>d</sup> ; K178 <sup>d</sup> ; K415 <sup>d</sup> ; K603 <sup>d</sup> ; K839 <sup>d</sup> ; K843 <sup>d, m</sup>                                                                                |
| Asp f FDH                              | Putative NAD-dependent formate dehydrogenase | 418 | S, M, G | K304 <sup>m</sup> ; K319 <sup>s, g</sup> ; K327 <sup>m</sup>                                                                                                                                            |
| Asp f MDH <sup>b</sup>                 | Putative NAD-dependent malate dehydrogenase  | 340 | S, M, G | K91 <sup>g</sup> ; K185 or K186 <sup>m</sup> ; K238 <sup>s, g, m</sup> ; K263 <sup>s, g, m</sup> ; K269 <sup>g</sup> ; K303 <sup>g</sup> ; K309 <sup>g, m</sup> ; K327 <sup>m</sup> ; K331 <sup>m</sup> |
| Asp f GT (Gel2)                        | GPI-anchored 1,3-beta-glucanosyltransferase  | 475 | S, M    | K36 <sup>m</sup> ; K187 <sup>m</sup> ; K372 <sup>m</sup> ; K379 <sup>s, m</sup> ; K388 <sup>m</sup> ; K393 <sup>m</sup>                                                                                 |
| Asp f GPI                              | Putative glucose-6-phosphate isomerase       | 553 | M       | K35 <sup>m</sup> ; K451 <sup>m</sup>                                                                                                                                                                    |
| Asp f AT_V                             | Putative class V aminotransferase            | 386 | M       | K381 <sup>m</sup>                                                                                                                                                                                       |
| Asp f gamma_Actin (Act1) <sup>b</sup>  | Actin                                        | 393 | M       | K346 <sup>m</sup>                                                                                                                                                                                       |
| Asp f RPS3 <sup>b</sup>                | 40S ribosomal protein S3                     | 266 | M       | K78 <sup>m</sup>                                                                                                                                                                                        |

332 <sup>a</sup> *A. fumigatus* allergens based on allergome website ([www.allergome.org](http://www.allergome.org)). <sup>b</sup> Allergens commonly detected in  
333 different surface proteomics data, see also Table S3.

### 334 3.4 Heat shock proteins are exposed to the surface

335 Heat shock proteins (HSPs) and a large set of co-chaperones are ubiquitous molecular  
336 chaperones that act in maintaining protein homeostasis [38]. It has been well established that  
337 HSPs are also secreted extracellularly or localized on the cell surface [39]. Hsp90, also known as

338 Asp f 12, is detectable on the cell wall of *A. fumigatus* [34] and it was also found to be  
 339 biotinylated in this study (Table 3). Considering the detection of biotinylated Hsp90 and Hsp70,  
 340 we investigated whether other chaperone-related proteins are present on the cell surface of *A.*  
 341 *fumigatus*. Indeed, at least 16 chaperone-related proteins were detected with biotinylation  
 342 modifications (Table 4). Most of the chaperones were detected on the surface of germlings or  
 343 hyphae with the exception of Scf1 and GrpE. Scf1 shows similarities to the 12 kDa heat shock  
 344 protein of *S. cerevisiae* and was biotinylated at K81 (Table 4). It is one of the most prevalent  
 345 proteins on dormant conidia of the *A. fumigatus* strains CEA10 (Table 2) and ATCC 46645 [10].  
 346 Six chaperones (Hsp70, Hsp88, HscA, BipA, Ssc70, and Lhs1) belonging to the Hsp70 family  
 347 were detected in our study (Table 4). In addition to Hsp70, four other Hsp70 family proteins  
 348 (Sti1, Hsp88, HscA, and Ssc70) have shown to induce serological antibody responses in ABPA  
 349 patients [37].

350 **Table 4.** Chaperones and co-chaperones with cell surface localization.

| Protein        | Accession  | Protein Description                                                   | AAs | Detected in the samples | Biotinylation sites                                                                                                                              |
|----------------|------------|-----------------------------------------------------------------------|-----|-------------------------|--------------------------------------------------------------------------------------------------------------------------------------------------|
| Scf1           | Afu1g17370 | Putative heat shock protein                                           | 89  | D                       | K81                                                                                                                                              |
| GrpE           | Afu2g13040 | Mitochondrial co-chaperone                                            | 250 | D, S                    | K99 <sup>d, s</sup>                                                                                                                              |
| Wos2           | Afu5g13920 | Putative Hsp90 binding co-chaperone                                   | 201 | S, G                    | K35 <sup>e</sup> ; K193 <sup>s</sup>                                                                                                             |
| Hsp60          | Afu2g09290 | Putative antigenic mitochondrial protein                              | 587 | G                       | K510                                                                                                                                             |
| Hsp90/Asp f 12 | Afu5g04170 | Heat shock protein                                                    | 706 | G                       | K481                                                                                                                                             |
| Afu6g10700     | Afu6g10700 | Ortholog(s) have chaperone binding, unfolded protein binding activity | 122 | G                       | K50; K56                                                                                                                                         |
| Sti1           | Afu7g01860 | Putative heat shock protein                                           | 581 | G                       | K232                                                                                                                                             |
| Hsp70          | Afu1g07440 | Molecular chaperone                                                   | 638 | G, M                    | Table 2                                                                                                                                          |
| Hsp88          | Afu1g12610 | Hsp70 chaperone                                                       | 714 | G, M                    | K130 or K133 <sup>m</sup> ; K216 <sup>m</sup> ; K260 <sup>m</sup> ; K271 <sup>g, m</sup>                                                         |
| HscA           | Afu8g03930 | Putative Hsp70 chaperone                                              | 614 | G, M                    | K59 <sup>m</sup> ; K429 <sup>e</sup> ; K498 <sup>e</sup> ; K531 <sup>e</sup> ; K539 <sup>e</sup> ; K566 or K568 <sup>e</sup> ; K609 <sup>e</sup> |



|            |            |                                                      |     |      |                                                                                                                                              |
|------------|------------|------------------------------------------------------|-----|------|----------------------------------------------------------------------------------------------------------------------------------------------|
| BipA       | Afu2g04620 | Hsp70 chaperone                                      | 672 | G, M | K133 <sup>m</sup> ; K549 <sup>s-m</sup>                                                                                                      |
| Ssc70      | Afu2g09960 | Putative mitochondrial Hsp70 chaperone               | 661 | G, M | K92 <sup>s-m</sup> ; K113 <sup>m</sup> ; K124 <sup>s-m</sup> ; K192 <sup>s</sup> ; K277 <sup>m</sup> ; K278 <sup>m</sup> ; K453 <sup>s</sup> |
| Lhs1       | Afu1g15050 | Hsp70 family chaperone                               | 997 | M    | K341                                                                                                                                         |
| ClxA       | Afu4g12850 | Calnexin, ER membrane chaperone                      | 563 | M    | K153                                                                                                                                         |
| Egd2       | Afu6g03820 | Nascent polypeptide-associated complex subunit alpha | 204 | M    | K50; K51; K62                                                                                                                                |
| Afu6g10320 | Afu6g10320 | Unfolded protein binding activity                    | 496 | M    | K143                                                                                                                                         |

351

352 To confirm the surface localization of the HSPs, we generated constructs by fusing a  
353 Myc-tag to the C-terminus of the HSPs. These constructs were ectopically integrated into the  
354 genome of *A. fumigatus* (Supplementary Table 1 and 2). The *hsp70-Myc*, *ssc70-Myc*, *bipA-Myc*  
355 and *ssz-Myc* transformants were verified by immunoblotting using an anti-Myc tag antibody  
356 (Figure S3). Using immunofluorescence microscopy, we found that all of the Myc-tagged fusion  
357 proteins were localized on the surface (Figure 4), except for the negative control, the HSP 70  
358 chaperone Ssz (Afu2g02320), which was not detected on the surface in our biotinylation  
359 experiment. This independently confirms that HSPs of *A. fumigatus* are localized to the cell  
360 surface of the fungus.

### 361 3.5 The core surface proteome (surfome) of *A. fumigatus*

362 Considering that several surface proteomic studies have been performed using different methods  
363 (trypsin-shaving, HF/pyridine, and formic acid extraction), we attempted to compare these  
364 datasets to provide a more comprehensive picture of the *A. fumigatus* surfome [9-11]. In total,  
365 992 different proteins were detected as surface proteins in this study and the aforementioned  
366 studies, including 437 proteins that were detected by at least two approaches (Figure 5 and Table  
367 S3). 43 proteins were commonly identified in all studies (Figure 5 and Table S3). These 43

368 proteins include 15 of the most prevalent proteins identified in our study and 9 allergens (Table 2,  
369 3, and S3). Two small proteins, Grg1 (glucose-repressible gene) and ConJ (conidiation-specific  
370 protein 10), were both detected among the most prevalent proteins on dormant conidia of the  
371 ATCC 46645 strain using the HF-pyridine extraction method [10], on the CEA10 strain using the  
372 trypsin shaving method [11], and in this study using biotinylation (Table 2). Grg1 was detected  
373 with biotinylation at the positions K32 and K46, while ConJ was biotinylated at the N-terminus  
374 and site K48 (Table 2). The conidial surface protein CcpA, which contributes to fungal  
375 virulence, was detected with biotinylations at positions K41 and K90 (Table S3). The putative  
376 GPI-anchored cell wall protein CweA [11] was detected with a biotinylation marker at site K358  
377 (Table S3). In addition to the 43 commonly detected proteins, 68 proteins were detected in at  
378 least four surfome datasets (Figure 5A), 44 of which were detected with biotinylated amino-  
379 groups (Table S3), including five allergens (Asp f 1, Asp f 4, Asp f 11, Asp f 12, and Asp f 18)  
380 and seven other prevalent proteins (1,3-beta-glucanosyltransferase Bgt1, cell wall protein Ecm33,  
381 nucleoside kinase Ndk1, eukaryotic initiation factor 5A [Afu1g04070], a putative ADP/ATP  
382 carrier [Afu1g05390], the 60S ribosomal protein L13 [Afu4g04460], and ubiquitin  
383 [Afu3g11260]) (Table 2). In total 133 surface proteins with biotinylation modifications were also  
384 confirmed by alternative methods (Figure 5B). All in all, the core-surfome of *A. fumigatus* builds  
385 a valuable database to provide protein targets for further studies on host-pathogen interactions,  
386 diagnosis, and immunotherapy.

#### 387 4. DISCUSSION

388 Proteins in combination with other cell wall components on the surface of *A. fumigatus* conidia  
389 play a key role in protecting the fungus from environmental insults and host defense responses

390 during an infection [10, 12, 15, 40, 41]. Several methods and techniques have been used to  
391 investigate the surface proteins of this pathogenic fungus, leading to the detection of hundreds of  
392 surface proteins, whose presence on the surface changes dynamically during development [9-11,  
393 19, 42]. Most methods used for the extraction of surface proteins, like enzymatic treatment with  
394 glucanase or trypsin or acidic extraction with formic acid or hydrogen-fluoride–pyridine, have  
395 the potential to release intracellular, unexposed cell wall proteins. Cell impermeable  
396 biotinylation reagents, which react with primary amines accessible on the cell surface, have  
397 successfully been used for labeling and identification of surface proteins with little  
398 contamination [15, 21, 22, 43, 44]. To further expand the *A. fumigatus* surface proteome and to  
399 solidify the data of the common core surfome of *A. fumigatus*, we used a surface biotinylation  
400 approach, which has not been applied to *A. fumigatus* previously. The aim was to characterize  
401 and detail the *A. fumigatus* surfome with surface exposed regions across germination and verify  
402 the surface localization of selected proteins by an additional method (Figure 4). Therefore, our  
403 work provides a multitude of candidates for further investigation of host-pathogen interaction  
404 and possible immuno-diagnostic/therapeutic usages.

405 Proteins on the surface mediate the direct contacts between pathogens and hosts. In  
406 addition to several known surface proteins, like RodA, CalA, Asp f 2, and CcpA [10, 12, 15, 18],  
407 abundant surface proteins detected in this study, such as Tef1, ArtA, Hsp70 and Hsp90, also  
408 have the potential to interact with a range of host proteins [45]. The *Candida albicans* Tef1 was  
409 shown to be able to bind human plasminogen, probably through the C-terminal lysine residues  
410 [46]. In this study, Tef1 was detected with biotinylation at the C-terminal K472–K486 region  
411 throughout germination (Table 1), indicating that Tef1 in *A. fumigatus* might have a similar  
412 function. The 14-3-3 proteins, such as ArtA, also have the ability to bind a multitude of proteins,

413 and play an important role in morphogenesis and sensing of environmental cues in fungi [47-49].  
414 The surface-localized heat shock proteins influence the interaction between bacterial and fungal  
415 pathogens and host cells as well [50-52]. For example, expression of *Listeria monocytogenes*  
416 heat shock protein ClpC, a member of the 100-kDa heat shock protein family, is required for cell  
417 adhesion and invasion [53], and also allows this bacterium to escape from the phagosome [54].  
418 The *C. albicans* Hsp70 protein Ssa1 is an invasin that binds to host cell cadherins to induce host  
419 cell endocytosis, which is critical for *C. albicans* to cause maximal damage [55]. In line with this,  
420 the *A. fumigatus* Hsp70 and Hsp90 were predicted to interact with host proteins in conidia  
421 containing mouse macrophage phagolysosomes [45], suggesting the potential roles of surface  
422 heat shock proteins in manipulating the host immune responses.

423 Besides their roles in pathogenicity, surface proteins could also be targets of  
424 immunotherapies based on antibodies. Surface proteins are particularly suitable due to their easy  
425 accessibility. Antibody-based therapies are rapidly growing, since they are a promising approach  
426 to directly attack the pathogen and boost the innate immune system. However, only a few  
427 monoclonal antibodies against fungal pathogens have been developed and advanced to clinical  
428 trials [56]. One example is Mycograb, an Hsp90-specific antibody fragment, which showed  
429 promise for treating *Candida* infections in combination with amphotericin B [57], but failed to  
430 obtain marketing authorization. In mouse experiments, treatment with anti-HSP 60 antibodies  
431 reduced fungal burden after infection with the dimorphic fungi *Histoplasma capsulatum* and  
432 *Paracoccidioides lutzii* [58, 59]. On the negative side, the amino acid sequences of HSPs are  
433 highly conserved and cross-reactivity may occur. For example, the epitope  
434 (NKILKVIRKNIVKK) that Mycograb targets shows high similarity between yeast, mice, and  
435 human homologues of Hsp90 [57], including *A. fumigatus* Hsp90 (NKIMKVIKKNIVKK, amino

436 acids 383–396). Other, abundant, fungal-specific surface proteins may represent better targets for  
437 immunotherapy as discussed in the following.

438 To date, more than 100 antigens or immune-reactive proteins of *A. fumigatus* have been  
439 identified using classical immunobiological procedures that react with sera from ABPA patients  
440 or animal models [35-37]. However, only a few recombinant allergens have been used  
441 commercially for diagnosis of allergic aspergillosis [5]. Although the crystal structures of some  
442 allergens are known [60, 61], the question of whether the allergen/protein exhibits special  
443 structural characteristics that are responsible for its allergenicity is still poorly understood. Thus,  
444 the information about the association of allergens with the different morphotypes (conidia,  
445 mycelium) and their exposed regions that may directly mediate the interaction with host  
446 components, such as IgE binding, is needed. Such knowledge creates the basis for the  
447 understanding of the immunological properties of protein antigens and is important for the  
448 establishment of new forms of diagnosis and treatment [62].

449 The cyclophilins, including Asp f 11 and Asp f 27 [61], which are structurally conserved  
450 pan-allergens showing extensive cross-reactivity [63, 64]. It was reported that the conserved  
451 N81–N149 region of Rhi o 2 from *Rhizopus oryzae* (Figure S4) is crucial for IgE-recognition and  
452 cross-reactivity [63]. In this study, however, the C-terminal region of Asp f 27, which is not  
453 conserved, was detected with biotinylation marks instead (Table 3 and Figure S4). Several other  
454 allergens were detected with biotinylation sites on different morphotypes, such as the K50–K101  
455 region of Asp f 6, K304–K327 region of Asp f FDH, K238–K269, and K303–K331 region of  
456 Asp f MDH (Table 3). Noteworthy, there were also regions of surface proteins that were detected  
457 on all morphotypes. For example, the K50–K55 region of RodA, K472–K486 region of Tef1,  
458 K122 region of Afu5g10550, K125–K141 region of Bgt1, K24–K63 region of Afu3g00880,

459 K225–K231 region of Bgt2, and K420–K435 region of the putative dihydrolipoamide  
460 dehydrogenase Afu2g02100 were all consistently surface exposed (Table 1). These peptides may  
461 represent promising candidate antigens for the development of monoclonal antibodies to be used  
462 for diagnosis and immunotherapy.

463 As published in our previous study, the surfome of *A. fumigatus* is dynamic [11].  
464 Correspondingly, a recent study also revealed that the phenotypes of *A. fumigatus* germinating  
465 conidia vary among genetically identical conidia. Here, we detected 74, 75, and 93 proteins on  
466 dormant, swollen, and germinating conidia, respectively; while 214 proteins were found on the  
467 surface of hyphae (Figure 3). Comparison of the different surface proteomics datasets helped to  
468 identify the core-surfome of *A. fumigatus* (Figure 5). These proteins, which are consistently  
469 found on the surface of *A. fumigatus*, likely play a role in mediating the interaction of *A.*  
470 *fumigatus* with the host or other organisms.

## 471 5. CONCLUSION

472 A surface biotinylation enrichment coupled with LC-MS/MS analysis was applied to study the  
473 surface proteome of *A. fumigatus* across germination. 314 surface proteins, including RodA,  
474 some virulence factors, allergens, and newly identified surface proteins were detected with  
475 biotinylation modifications, confirming exposed surfaces for these proteins. These data highlight  
476 not only the surface proteins but also the exposed regions that could be used in the future for new  
477 diagnostic tools and immunotherapies based on monoclonal antibodies or T cell-based vaccines.

## 478 ASSOCIATED CONTENT

479 Supporting Information

480 Table S1. *A. fumigatus* strains used in this study.

481 Table S2. Oligonucleotides used in this study.

482 Table S3. Proteins of *A. fumigatus* detected with biotinylation marks.

483 Dataset 1. Streptavidin enriched *A. fumigatus* proteins detected by LC-MS/MS. For the headers,  
484 B1, B2, B3, and B4 are different repeats of biotinylated samples; C1, C2, C3, and C4 are  
485 different repeats of control samples.

486 Figure S1. Immunofluorescence staining of biotinylated (A) and non-biotinylated (B) *A.*  
487 *fumigatus* morphotypes with Alexa Fluor™ 635 conjugated streptavidin (Streptavidin-AF635).  
488 Germlings indicated with dashed boxes are also shown in Figure 2A. Scale bar is 10  $\mu$ m.

489 Figure S2. Immunoblotting analysis of swollen conidia and mycelia protein extracts. Crude  
490 protein extracts (crude) and purified proteins (streptavidin purified) from PBS buffer (PBS) and  
491 SDS buffer (SDS) were separated on SDS-PAGE and then transferred to PVDF membrane.  
492 Biotinylated proteins were detected with Pierce® streptavidin-HRP. B, biotinylated; N, non-  
493 biotinylated.

494 Figure S3. Immunoblotting of *A. fumigatus* protein extracts. Myc-tagged proteins were detected  
495 using  $\alpha$ -Myc antibody. For the *hsp70-Myc* and *ssc70-Myc* expressing *A. fumigatus* strains,  
496 protein was extracted from dormant conidia; while for the *ssz-Myc* and *bipA-Myc* expressing  
497 strains, protein was extracted from mycelium. An  $\alpha$ -GAPDH antibody served as loading control.

498 Figure S4. Alignment of Asp f 27 and homologous proteins. Lysine residues of Asp f 27 detected  
499 with biotinylation marks in this study are indicated with arrows. Protein sequences of Asp f 27  
500 (UniProtKB: Q4WWX5), CaCYP1 (*Candida albicans*, UniProtKB: P22011), and CPR1  
501 (*Saccharomyces cerevisiae*, UniProtKB: P14832), and Rhi o 2 (*Rhizopus delemar*, UniProtKB:  
502 P0C1H7) are downloaded from UniProt Knowledgebase ([www.uniprot.org](http://www.uniprot.org)). Protein sequences

503 of *Olea europaea* (GenBank: AVV30163.1), HuCYPA (Homo sapiens, GenBank:  
504 AAH05982.1), and ROC5 (*Arabidopsis thaliana*, NCBI Reference Sequence: NP\_195213.1)  
505 were downloaded from NCBI ([www.ncbi.nlm.nih.gov](http://www.ncbi.nlm.nih.gov)).

## 506 AUTHOR INFORMATION

### 507 Corresponding Author

508 \*Email: [olaf.kniemeyer@leibniz-hki.de](mailto:olaf.kniemeyer@leibniz-hki.de) (OK); [axel.brakhage@leibniz-hki.de](mailto:axel.brakhage@leibniz-hki.de) (AAB);  
509 Tel: 49 (0)3641-532 1071 (OK); 49 (0)3641-532 1001 (AAB).

### 510 ORCID

511 Lei-Jie Jia: 0000-0001-7958-6187;

512 Thomas Krüger: 0000-0001-8984-3853

513 Matthew G. Blango: 0000-0001-8015-9019;

514 Olaf Kniemeyer: 0000-0002-9493-6402;

515 Axel A. Brakhage: 0000-0002-8814-4193.

### 516 Notes

517 The authors declare no conflicts of interest.

## 518 ACKNOWLEDGMENT

519 This work was supported by the Deutsche Forschungsgemeinschaft (DFG)-funded French-  
520 German project “AfuInf”, the DFG Collaborative Research Center/Transregio FungiNet 124  
521 ‘Pathogenic fungi and their human host: Networks of Interaction’ (project A1, Z2), and the



522 Federal Ministry of Education and Research, project EXASENS (13N13861). The funder had no  
523 role in the design or choice to publish these data.

## 524 **Figure legends**

525 **Figure 1.** Flowchart for the biotinylation and purification of *A. fumigatus* surface proteins. The  
526 procedure starts with covalent labeling of surface proteins with Sulfo-NHS-LC-Biotin for 30 min  
527 at 4°C. The fungal material was broken with glass beads in PBS buffer to release the loosely  
528 attached surface proteins (PBS extracts). Some non-covalently linked cell wall proteins were  
529 extracted using SDS buffer. Biotinylated proteins were purified using magnetic streptavidin  
530 beads and then analyzed by LC-MS/MS.

531 **Figure 2.** Detection of *A. fumigatus* surface protein biotinylation. (A) Immunofluorescence  
532 staining of *A. fumigatus* dormant conidia and germinating conidia with Alexa Fluor™ 635  
533 conjugated streptavidin (Streptavidin-AF635). Scale bar is 10 µm. (B) Immunoblotting analysis  
534 of the crude protein extracts and purified proteins from dormant and germinating conidia. B,  
535 biotinylated; N, non-biotinylated; PBS, PBS extracts; SDS, SDS buffer extracts; CBB,  
536 Coomassie brilliant blue.

537 **Figure 3.** Overview of the surface proteome identified by biotinylation coupled with LC-MS/MS  
538 analysis. (A) Number of proteins identified in different samples. <sup>a</sup>, number of proteins identified  
539 by at least two unique peptides or with PSMs (peptide spectrum matches)  $\geq 10$  were considered.  
540 <sup>b</sup>, number of proteins detected with at least one peptide with biotinylation modification. (B and  
541 C) Venn diagrams showing the common and specific surface proteins with biotinylation across  
542 different extractions (B) and developmental stages (C).

543 **Figure 4.** Immunofluorescence staining of *A. fumigatus* germlings. Germlings were blocked in  
544 PBS with 1% (w/v) BSA, and then incubated with the primary anti-Myc antibody. The surface  
545 Myc-tagged Hsp70s were indirectly detected with an AF568 conjugated secondary antibody.  
546 Scale bar = 10  $\mu\text{m}$ .

547 **Figure 5.** The number of *A. fumigatus* surface proteins identified in different surface proteomics  
548 experiments. (A) Pie chart shows the number of proteins present in different experiments. (B)  
549 Each of the bars represents the number of identified proteins, with black zones highlighting the  
550 number of proteins present in all of the surfome data available, including the results obtained in  
551 this study (CEA10 B, CEA10 using biotinylation method), the surfome of CEA10 (CEA10 T,  
552 CEA10 using trypsin shaving method) and D141 obtained using trypsin shaving method [10, 11],  
553 the CEA17 $\Delta$ *akuB*<sup>KU80</sup> dormant conidia surfome obtained from the formic acid extract [9], and  
554 the ATCC 46645 surfome detected by hydrogen fluoride-pyridine extraction and trypsin shaving  
555 [10]. The pink zones highlight the number of proteins present in at least two but not all the  
556 surfome data. Grey zones indicate the number of proteins present in just one experiment.

## 557 REFERENCES

- 558 [1] C. Kosmidis, D.W. Denning, The clinical spectrum of pulmonary aspergillosis, *Thorax* 70(3)  
559 (2015) 270-7.  
560 [2] J.P. Latgé, G. Chamilos, *Aspergillus fumigatus* and Aspergillosis in 2019, *Clin. Microbiol.*  
561 *Rev.* 33(1) (2019) e00140-18.  
562 [3] R. Agarwal, A. Chakrabarti, A. Shah, D. Gupta, J.F. Meis, R. Guleria, R. Moss, D.W.  
563 Denning, A.c.a.I.w. group, Allergic bronchopulmonary aspergillosis: review of literature and  
564 proposal of new diagnostic and classification criteria, *Clin. Exp. Allergy* 43(8) (2013) 850–873.  
565 [4] M. Kousha, R. Tadi, A.O. Soubani, Pulmonary aspergillosis: a clinical review, *Eur. Respir.*  
566 *Rev.* 20(121) (2011) 156–174.  
567 [5] B. Singh, S. Singh, A.R. Asif, M. Oellerich, G.L. Sharma, Allergic aspergillosis and the  
568 antigens of *Aspergillus fumigatus*, *Curr. Protein Pept. Sci.* 15(5) (2014) 403–423.  
569 [6] S.M. Levitz, *Aspergillus* vaccines: Hardly worth studying or worthy of hard study?, *Med.*  
570 *Mycol.* 55(1) (2017) 103–108.

- 571 [7] O. Kniemeyer, F. Ebel, T. Kruger, P. Bacher, A. Scheffold, T. Luo, M. Strassburger, A.A.  
572 Brakhage, Immunoproteomics of *Aspergillus* for the development of biomarkers and  
573 immunotherapies, *Proteomics Clin Appl* 10(9-10) (2016) 910-921.
- 574 [8] M.G. Blango, O. Kniemeyer, A.A. Brakhage, Conidial surface proteins at the interface of  
575 fungal infections, *PLoS Pathog.* 15(9) (2019) e1007939.
- 576 [9] I. Valsecchi, V. Dupres, J.P. Michel, M. Duchateau, M. Matondo, G. Chamilos, C. Saveanu,  
577 J.I. Guijarro, V. Aimanianda, F. Lafont, J.P. Latgé, A. Beauvais, The puzzling construction of  
578 the conidial outer layer of *Aspergillus fumigatus*, *Cell. Microbiol.* 21(5) (2019) e12994.
- 579 [10] V. Voltersen, M.G. Blango, S. Herrmann, F. Schmidt, T. Heinekamp, M. Strassburger, T.  
580 Krüger, P. Bacher, J. Lother, E. Weiss, K. Hünninger, H. Liu, P. Hortschansky, A. Scheffold,  
581 J. Löffler, S. Krappmann, S. Nietzsche, O. Kurzai, H. Einsele, O. Kniemeyer, S.G. Filler, U.  
582 Reichard, A.A. Brakhage, Proteome analysis reveals the conidial surface protein CcpA essential  
583 for virulence of the pathogenic fungus *Aspergillus fumigatus*, *MBio* 9(5) (2018) e01557-18.
- 584 [11] M.G. Blango, A. Pschibul, F. Rivieccio, T. Krüger, M. Rafiq, L.-J. Jia, T. Zheng, M.  
585 Goldmann, V. Voltersen, J. Li, G. Panagiotou, O. Kniemeyer, A.A. Brakhage, The dynamic  
586 surface proteomes of allergenic fungal conidia, *J. Proteome Res.* (2020).
- 587 [12] V. Aimanianda, J. Bayry, S. Bozza, O. Kniemeyer, K. Perruccio, S.R. Elluru, C. Clavaud, S.  
588 Paris, A.A. Brakhage, S.V. Kaveri, L. Romani, J.P. Latgé, Surface hydrophobin prevents  
589 immune recognition of airborne fungal spores, *Nature* 460(7259) (2009) 1117–1121.
- 590 [13] J. Carrion Sde, S.M. Leal, Jr., M.A. Ghannoum, V. Aimanianda, J.P. Latgé, E. Pearlman,  
591 The RodA hydrophobin on *Aspergillus fumigatus* spores masks dectin-1- and dectin-2-dependent  
592 responses and enhances fungal survival in vivo, *J. Immunol.* 191(5) (2013) 2581–2588.
- 593 [14] N. Thau, M. Monod, B. Crestani, C. Rolland, G. Tronchin, J.P. Latgé, S. Paris, *rodletless*  
594 mutants of *Aspergillus fumigatus*, *Infect. Immun.* 62(10) (1994) 4380–4388.
- 595 [15] H. Liu, M.J. Lee, N.V. Solis, Q.T. Phan, M. Swidergall, B. Ralph, A.S. Ibrahim, D.C.  
596 Sheppard, S.G. Filler, *Aspergillus fumigatus* CalA binds to integrin  $\alpha 5 \beta 1$  and mediates host cell  
597 invasion, *Nat. Microbiol.* 2 (2016) 16211.
- 598 [16] J. Amich, R. Vicentefranqueira, F. Leal, J.A. Calera, *Aspergillus fumigatus* survival in  
599 alkaline and extreme zinc-limiting environments relies on the induction of a zinc homeostasis  
600 system encoded by the *zrfC* and *aspf2* genes, *Eukaryot. Cell* 9(3) (2010) 424–437.
- 601 [17] B. Banerjee, P.A. Greenberger, J.N. Fink, V.P. Kurup, Immunological characterization of  
602 *Asp f 2*, a major allergen from *Aspergillus fumigatus* associated with allergic bronchopulmonary  
603 aspergillosis, *Infect. Immun.* 66(11) (1998) 5175–5182.
- 604 [18] P. Dasari, I.A. Shopova, M. Stroe, D. Wartenberg, H. Martin-Dahse, N. Beyersdorf, P.  
605 Hortschansky, S. Dietrich, Z. Cseresnyés, M.T. Figge, M. Westermann, C. Skerka, A.A.  
606 Brakhage, P.F. Zipfel, *Aspf2* from *Aspergillus fumigatus* recruits human immune regulators for  
607 immune evasion and cell damage, *Front. Immunol.* 9 (2018) 1635.
- 608 [19] A.R. Asif, M. Oellerich, V.W. Armstrong, B. Riemenschneider, M. Monod, U. Reichard,  
609 Proteome of conidial surface associated proteins of *Aspergillus fumigatus* reflecting potential  
610 vaccine candidates and allergens, *J. Proteome Res.* 5(4) (2006) 954–962.
- 611 [20] J. Esbelin, T. Santos, C. Ribière, M. Desvaux, D. Viala, C. Chambon, M. Hébraud,  
612 Comparison of three methods for cell surface proteome extraction of *Listeria monocytogenes*  
613 biofilms, *OMICS* 22(12) (2018) 779–787.
- 614 [21] C. Urban, K. Sohn, F. Lottspeich, H. Brunner, S. Rupp, Identification of cell surface  
615 determinants in *Candida albicans* reveals *Tsa1p*, a protein differentially localized in the cell,  
616 *FEBS Lett.* 544(1-3) (2003) 228–235.

- 617 [22] N. de Miguel, G. Lustig, O. Twu, A. Chattopadhyay, J.A. Wohlschlegel, P.J. Johnson,  
618 Proteome analysis of the surface of *Trichomonas vaginalis* reveals novel proteins and strain-  
619 dependent differential expression, *Mol. Cell. Proteomics* 9(7) (2010) 1554–1566.
- 620 [23] D. Wessel, U.I. Flügge, A method for the quantitative recovery of protein in dilute solution  
621 in the presence of detergents and lipids, *Anal. Biochem.* 138(1) (1984) 141–143.
- 622 [24] K. Lapp, M. Vödisch, K. Kroll, M. Strassburger, O. Kniemeyer, T. Heinekamp, A.A.  
623 Brakhage, Characterization of the *Aspergillus fumigatus* detoxification systems for reactive  
624 nitrogen intermediates and their impact on virulence, *Front. Microbiol.* 5 (2014) 469.
- 625 [25] M.E. da Silva Ferreira, M.R. Kress, M. Savoldi, M.H. Goldman, A. Härtl, T. Heinekamp,  
626 A.A. Brakhage, G.H. Goldman, The *akuB*(KU80) mutant deficient for nonhomologous end  
627 joining is a powerful tool for analyzing pathogenicity in *Aspergillus fumigatus*, *Eukaryot. Cell*  
628 5(1) (2006) 207–211.
- 629 [26] Y. Perez-Riverol, A. Csordas, J. Bai, M. Bernal-Llinares, S. Hewapathirana, D.J. Kundu, A.  
630 Inuganti, J. Griss, G. Mayer, M. Eisenacher, E. Pérez, J. Uszkoreit, J. Pfeuffer, T. Sachsenberg,  
631 S. Yilmaz, S. Tiwary, J. Cox, E. Audain, M. Walzer, A.F. Jarnuczak, T. Ternent, A. Brazma,  
632 J.A. Vizcaino, The PRIDE database and related tools and resources in 2019: improving support  
633 for quantification data, *Nucleic Acids Res.* 47(D1) (2019) D442–D450.
- 634 [27] G. Elia, Biotinylation reagents for the study of cell surface proteins, *Proteomics* 8(19)  
635 (2008) 4012–4024.
- 636 [28] E.Y. Basenko, J.A. Pulman, A. Shanmugasundram, O.S. Harb, K. Crouch, D. Starns, S.  
637 Warrenfeltz, C. Aurecochea, C.J. Stoeckert, Jr., J.C. Kissinger, D.S. Roos, C. Hertz-Fowler,  
638 FungiDB: An integrated bioinformatic resource for fungi and oomycetes, *J. Fungi* 4(1) (2018)  
639 39.
- 640 [29] J. Teutschbein, D. Albrecht, M. Pötsch, R. Guthke, V. Aimanianda, C. Clavaud, J.P. Latgé,  
641 A.A. Brakhage, O. Kniemeyer, Proteome profiling and functional classification of intracellular  
642 proteins from conidia of the human-pathogenic mold *Aspergillus fumigatus*, *J. Proteome Res.*  
643 9(7) (2010) 3427–3442.
- 644 [30] A. Beauvais, M. Monod, J.P. Debeaupuis, M. Diaquin, H. Kobayashi, J.P. Latgé,  
645 Biochemical and antigenic characterization of a new dipeptidyl-peptidase isolated from  
646 *Aspergillus fumigatus*, *J. Biol. Chem.* 272(10) (1997) 6238–6244.
- 647 [31] I. Mouyna, R.P. Hartland, T. Fontaine, M. Diaquin, C. Simenel, M. Delepierre, B.  
648 Henrissat, J.P. Latgé, A 1,3-beta-glucanosyltransferase isolated from the cell wall of *Aspergillus*  
649 *fumigatus* is a homologue of the yeast Bgl2p, *Microbiology* 144 ( Pt 11) (1998) 3171–3180.
- 650 [32] A. Gastebois, I. Mouyna, C. Simenel, C. Clavaud, B. Coddeville, M. Delepierre, J.P. Latgé,  
651 T. Fontaine, Characterization of a new beta(1-3)-glucan branching activity of *Aspergillus*  
652 *fumigatus*, *J. Biol. Chem.* 285(4) (2010) 2386–2396.
- 653 [33] F.N. Gravelat, D.E. Ejzykowicz, L.Y. Chiang, J.C. Chabot, M. Urb, K.D. Macdonald, N. al-  
654 Bader, S.G. Filler, D.C. Sheppard, *Aspergillus fumigatus* MedA governs adherence, host cell  
655 interactions and virulence, *Cell. Microbiol.* 12(4) (2010) 473–488.
- 656 [34] F. Lamoth, P.R. Juvvadi, E.J. Soderblom, M.A. Moseley, W.J. Steinbach, Hsp70 and the  
657 Cochaperone StiA (Hop) Orchestrate Hsp90-Mediated Caspofungin Tolerance in *Aspergillus*  
658 *fumigatus*, *Antimicrob. Agents Chemother.* 59(8) (2015) 4727–4733.
- 659 [35] A.R. Asif, M. Oellerich, V.W. Armstrong, U. Gross, U. Reichard, Analysis of the cellular  
660 *Aspergillus fumigatus* proteome that reacts with sera from rabbits developing an acquired  
661 immunity after experimental aspergillosis, *Electrophoresis* 31(12) (2010) 1947–1958.

- 662 [36] B. Singh, M. Oellerich, R. Kumar, M. Kumar, D.P. Bhadoria, U. Reichard, V.K. Gupta,  
663 G.L. Sharma, A.R. Asif, Immuno-reactive molecules identified from the secreted proteome of  
664 *Aspergillus fumigatus*, J. Proteome Res. 9(11) (2010) 5517–5529.
- 665 [37] B. Singh, G.L. Sharma, M. Oellerich, R. Kumar, S. Singh, D.P. Bhadoria, A. Katyal, U.  
666 Reichard, A.R. Asif, Novel cytosolic allergens of *Aspergillus fumigatus* identified from  
667 germinating conidia, J. Proteome Res. 9(11) (2010) 5530–5541.
- 668 [38] R. Rosenzweig, N.B. Nillegoda, M.P. Mayer, B. Bukau, The Hsp70 chaperone network,  
669 Nat. Rev. Mol. Cell Biol. 20(11) (2019) 665–680.
- 670 [39] A. De Maio, D. Vazquez, Extracellular heat shock proteins: a new location, a new function,  
671 Shock 40(4) (2013) 239–246.
- 672 [40] T. Akoumianaki, I. Kyrmizi, I. Valsecchi, M.S. Gresnigt, G. Samonis, E. Drakos, D.  
673 Boumpas, L. Muszkiet, M.C. Prevost, D.P. Kontoyiannis, T. Chavakis, M.G. Netea, F.L. van de  
674 Veerdonk, A.A. Brakhage, J. El-Benna, A. Beauvais, J.P. Latgé, G. Chamilos, *Aspergillus* cell  
675 wall melanin blocks LC3-associated phagocytosis to promote pathogenicity, Cell Host Microbe.  
676 19(1) (2016) 79–90.
- 677 [41] I. Kyrmizi, H. Ferreira, A. Carvalho, J.A.L. Figueroa, P. Zampas, C. Cunha, T.  
678 Akoumianaki, K. Stylianou, G.S. Deepe, Jr., G. Samonis, J.F. Lacerda, A. Campos, Jr., D.P.  
679 Kontoyiannis, N. Mihalopoulos, K.J. Kwon-Chung, J. El-Benna, I. Valsecchi, A. Beauvais, A.A.  
680 Brakhage, N.M. Neves, J.P. Latgé, G. Chamilos, Calcium sequestration by fungal melanin  
681 inhibits calcium-calmodulin signalling to prevent LC3-associated phagocytosis, Nat. Microbiol.  
682 3 (2018) 791–803.
- 683 [42] S.E. Cagas, M.R. Jain, H. Li, D.S. Perlin, Profiling the *Aspergillus fumigatus* proteome in  
684 response to caspofungin, Antimicrob. Agents Chemother. 55(1) (2011) 146–154.
- 685 [43] A.J. Foster, R.A. Bird, S.N. Smith, Biotinylation and characterization of *Cryptococcus*  
686 *neoformans* cell surface proteins, J. Appl. Microbiol. 103(2) (2007) 390–399.
- 687 [44] E.M. Conn, M.A. Madsen, B.F. Cravatt, W. Ruf, E.I. Deryugina, J.P. Quigley, Cell surface  
688 proteomics identifies molecules functionally linked to tumor cell intravasation, J. Biol. Chem.  
689 283(39) (2008) 26518–26527.
- 690 [45] H. Schmidt, S. Vlais, T. Krüger, F. Schmidt, J. Balkenhol, T. Dandekar, R. Guthke, O.  
691 Kniemeyer, T. Heinekamp, A.A. Brakhage, Proteomics of *Aspergillus fumigatus* conidia-  
692 containing phagolysosomes identifies processes governing immune evasion, Mol. Cell.  
693 Proteomics 17(6) (2018) 1084–1096.
- 694 [46] J.D. Crowe, I.K. Sievwright, G.C. Auld, N.R. Moore, N.A. Gow, N.A. Booth, *Candida*  
695 *albicans* binds human plasminogen: identification of eight plasminogen-binding proteins, Mol.  
696 Microbiol. 47(6) (2003) 1637–1651.
- 697 [47] P.R. Kraus, A.F. Hofmann, S.D. Harris, Characterization of the *Aspergillus nidulans* 14-3-3  
698 homologue, ArtA, FEMS Microbiol. Lett. 210(1) (2002) 61–66.
- 699 [48] B.A. Ibarra, J.M. Lohmar, T. Satterlee, T. McDonald, J.W. Cary, A.M. Calvo, The 14-3-3  
700 protein homolog ArtA regulates development and secondary metabolism in the opportunistic  
701 plant pathogen *Aspergillus flavus*, Appl. Environ. Microbiol. 84(5) (2018) e02241-17.
- 702 [49] E.K. Brauer, N. Manes, C. Bonner, R. Subramaniam, Two 14-3-3 proteins contribute to  
703 nitrogen sensing through the TOR and glutamine synthetase-dependent pathways in *Fusarium*  
704 *graminearum*, Fungal Genet. Biol. 134 (2020) 103277.
- 705 [50] X.S. Li, J.N. Sun, K. Okamoto-Shibayama, M. Edgerton, *Candida albicans* cell wall ssa  
706 proteins bind and facilitate import of salivary histatin 5 required for toxicity, J. Biol. Chem.  
707 281(32) (2006) 22453–22463.



- 708 [51] C.P. Silveira, A.C. Piffer, L. Kmetzsch, F.L. Fonseca, D.A. Soares, C.C. Staats, M.L.  
709 Rodrigues, A. Schrank, M.H. Vainstein, The heat shock protein (Hsp) 70 of *Cryptococcus*  
710 *neoformans* is associated with the fungal cell surface and influences the interaction between  
711 yeast and host cells, *Fungal Genet. Biol.* 60 (2013) 53–63.
- 712 [52] L. Neckers, U. Tatu, Molecular chaperones in pathogen virulence: emerging new targets for  
713 therapy, *Cell Host Microbe.* 4(6) (2008) 519–527.
- 714 [53] S. Nair, E. Milohanic, P. Berche, ClpC ATPase is required for cell adhesion and invasion of  
715 *Listeria monocytogenes*, *Infect. Immun.* 68(12) (2000) 7061–7068.
- 716 [54] C. Rouquette, C. de Chastellier, S. Nair, P. Berche, The ClpC ATPase of *Listeria*  
717 *monocytogenes* is a general stress protein required for virulence and promoting early bacterial  
718 escape from the phagosome of macrophages, *Mol. Microbiol.* 27(6) (1998) 1235–1245.
- 719 [55] J.N. Sun, N.V. Solis, Q.T. Phan, J.S. Bajwa, H. Kashleva, A. Thompson, Y. Liu, A.  
720 Dongari-Bagtzoglou, M. Edgerton, S.G. Filler, Host cell invasion and virulence mediated by  
721 *Candida albicans* Ssa1, *PLoS Pathog.* 6(11) (2010) e1001181.
- 722 [56] R. Hooft van Huijsduijnen, S. Kojima, D. Carter, H. Okabe, A. Sato, W. Akahata, T.N.C.  
723 Wells, K. Katsuno, Reassessing therapeutic antibodies for neglected and tropical diseases, *PLoS*  
724 *Negl. Trop. Dis.* 14(1) (2020) e0007860.
- 725 [57] R.C. Matthews, G. Rigg, S. Hodgetts, T. Carter, C. Chapman, C. Gregory, C. Illidge, J.  
726 Burnie, Preclinical assessment of the efficacy of mycograb, a human recombinant antibody  
727 against fungal HSP90, *Antimicrob. Agents Chemother.* 47(7) (2003) 2208–2216.
- 728 [58] L. Thomaz, J.D. Nosanchuk, D.C.P. Rossi, L.R. Travassos, C.P. Tabora, Monoclonal  
729 antibodies to heat shock protein 60 induce a protective immune response against experimental  
730 *Paracoccidioides lutzii*, *Microbes Infect.* 16(9) (2014) 788–795.
- 731 [59] A.J. Guimarães, S. Frases, F.J. Gomez, R.M. Zancopé-Oliveira, J.D. Nosanchuk,  
732 Monoclonal antibodies to heat shock protein 60 alter the pathogenesis of *Histoplasma*  
733 *capsulatum*, *Infect. Immun.* 77(4) (2009) 1357–1367.
- 734 [60] F. Hillmann, K. Bagramyan, M. Straßburger, T. Heinekamp, T.B. Hong, K.P. Bzymek, J.C.  
735 Williams, A.A. Brakhage, M. Kalkum, The crystal structure of peroxiredoxin Asp f3 provides  
736 mechanistic insight into oxidative stress resistance and virulence of *Aspergillus fumigatus*, *Sci.*  
737 *Rep.* 6 (2016) 33396.
- 738 [61] A.G. Glaser, A. Limacher, F. S., A. Scheynius, L. Scapozza, R. Cramer, Analysis of the  
739 cross-reactivity and of the 1.5 Å crystal structure of the *Malassezia sympodialis* Mala s 6  
740 allergen, a member of the cyclophilin pan-allergen family, *Biochem. J.* 396(1) (2006) 41–49.
- 741 [62] T.E. Twaroch, M. Curin, R. Valenta, I. Swoboda, Mold allergens in respiratory allergy:  
742 from structure to therapy, *Allergy Asthma Immunol. Res.* 7(3) (2015) 205–220.
- 743 [63] G. Sircar, M. Bhowmik, R.K. Sarkar, N. Najafi, A. Dasgupta, M. Focke-Tejkl, S. Flicker, I.  
744 Mittermann, R. Valenta, K. Bhattacharya, S. Gupta Bhattacharya, Molecular characterization of  
745 a fungal cyclophilin allergen Rhi o 2 and elucidation of antigenic determinants responsible for  
746 IgE-cross-reactivity, *J. Biol. Chem.* 295(9) (2020) 2736–2748.
- 747 [64] P. San Segundo-Acosta, C. Oeo-Santos, S. Benedé, V. de Los Ríos, A. Navas, B. Ruiz-  
748 Leon, C. Moreno, C. Pastor-Vargas, A. Jurado, M. Villalba, R. Barderas, Delineation of the olive  
749 pollen proteome and its allergenome unmasks cyclophilin as a relevant cross-reactive allergen, *J.*  
750 *Proteome Res.* 18(8) (2019) 3052–3066.

751

**Table S1.** *A. fumigatus* strains used in this study.

| <b>Description</b> | <b>Relevant genotype</b>                      | <b>Reference or source</b>           |
|--------------------|-----------------------------------------------|--------------------------------------|
| Wild type          | CEA10                                         | Fungal Genetics Stock Center (A1163) |
| A1160              | $\Delta ku80$ pyrG <sup>+</sup>               | da Silva Ferreira et al., 2006 [25]  |
| <i>hsp70-Myc</i>   | A1160 <i>hsp70-Myc-ptrA</i> ; PT <sup>R</sup> | This study                           |
| <i>ssc70-Myc</i>   | A1160 <i>ssc70-Myc-ptrA</i> ; PT <sup>R</sup> | This study                           |
| <i>bipA-Myc</i>    | A1160 <i>bipA-Myc-ptrA</i> ; PT <sup>R</sup>  | This study                           |
| <i>ssz-Myc</i>     | A1160 <i>ssz-Myc-ptrA</i> ; PT <sup>R</sup>   | This study                           |

752

753

**Table S2.** Oligonucleotides used in this study.

| <b>Name</b> | <b>Sequence 5' to 3'</b>                           | <b>Usage</b>          |
|-------------|----------------------------------------------------|-----------------------|
| Ssc70-M_F   | TTCGAGCTCGGTACCTTCTCGGAATGACATTAAGC                | Plasmid pLJ-Ssc70-Myc |
| Ssc70-M_R   | AAGATCCTCCTCGGAGATAAGCTTCTGCTCGGGCTTGTTCTCACCTG    |                       |
| Myc_F       | ATCTCCGAGGAGGATCTTGGCTCCGGCTCCTAAAGCGGCCCGCCGGCTGC |                       |
| pTH_R       | CCTGAGTGGCCATCGAATTC                               |                       |
| Hsp70-M_F   | TTCGAGCTCGGTACCTGAGAGAGCCGAGGGCTACG                | Plasmid pLJ-Hsp70-Myc |
| Hsp70-M_R   | CCTCCTCGGAGATAAGCTTCTGCTCGTCAAGCTCCTCAGGGCGCT      |                       |
| BipA-M_F    | TTCGAGCTCGGTACCCCGAGTACATTGATAGAGG                 | Plasmid pLJ-BipA-Myc  |
| BipA-M_R    | CTCGGAGATAAGCTTCTGCTCCAGTTCGTTCATGTCCGCTGG         |                       |
| Ssz-M_F     | TTCGAGCTCGGTACCCCTCCGTTCAATGGGCCCAA                | Plasmid pLJ-Ssz-Myc   |
| Ssz-M_R     | CTCGGAGATAAGCTTCTGCTCAGCCTTGGGCGACTCGACGG          |                       |

754

Figure 1

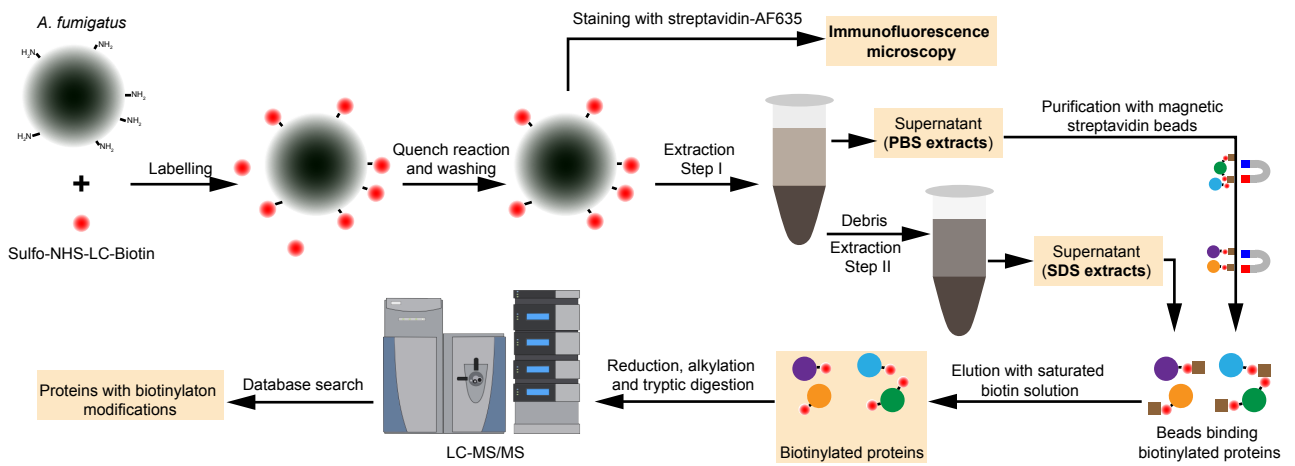



## Figure 2

**A**

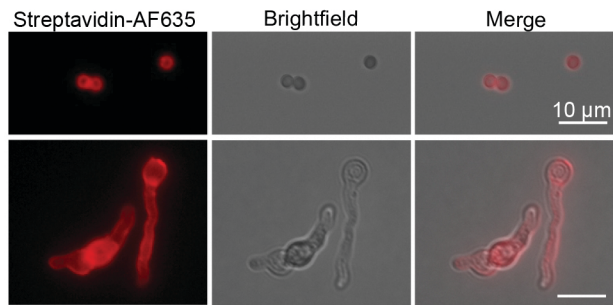

**B**

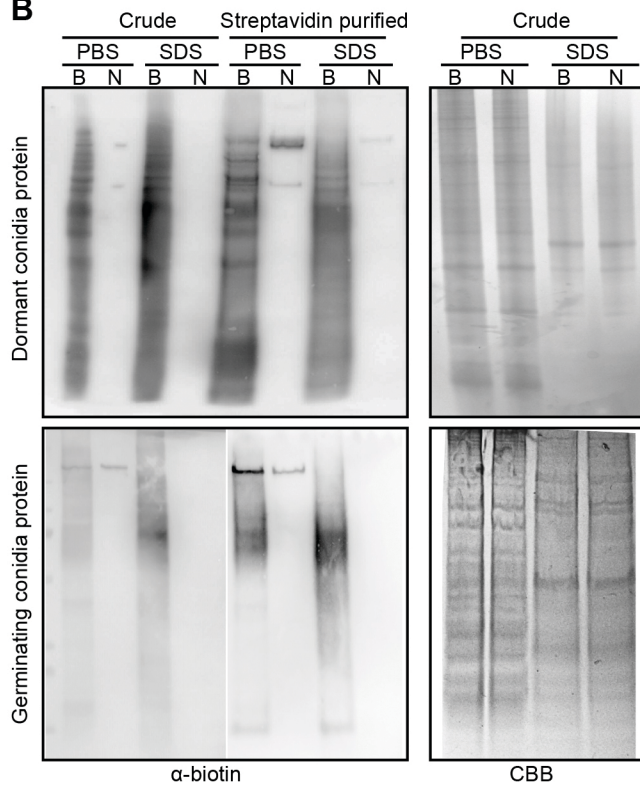

Figure 3

**A**

| Samples    | Total protein <sup>a</sup> |     | Biotinylated protein <sup>b</sup> |     |
|------------|----------------------------|-----|-----------------------------------|-----|
|            | PBS                        | SDS | PBS                               | SDS |
| DC         | 518                        | 362 | 60                                | 21  |
| SC         | 550                        | 269 | 69                                | 11  |
| GC         | 618                        | 247 | 88                                | 8   |
| M          | 486                        | 178 | 202                               | 53  |
| <b>Sum</b> | <b>1139</b>                |     | <b>314</b>                        |     |

**B**

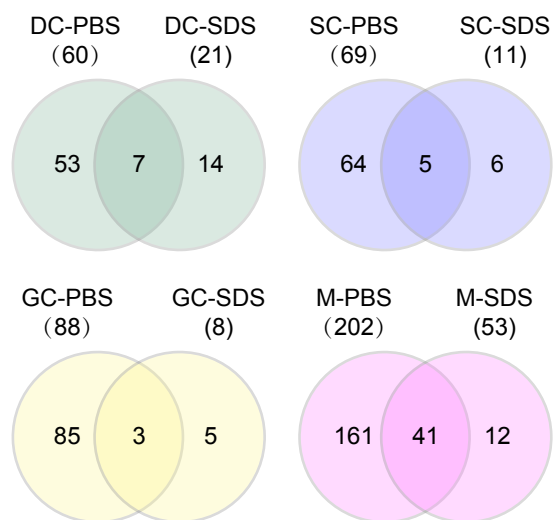

**C**

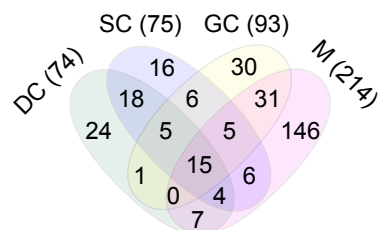

**Figure 4**

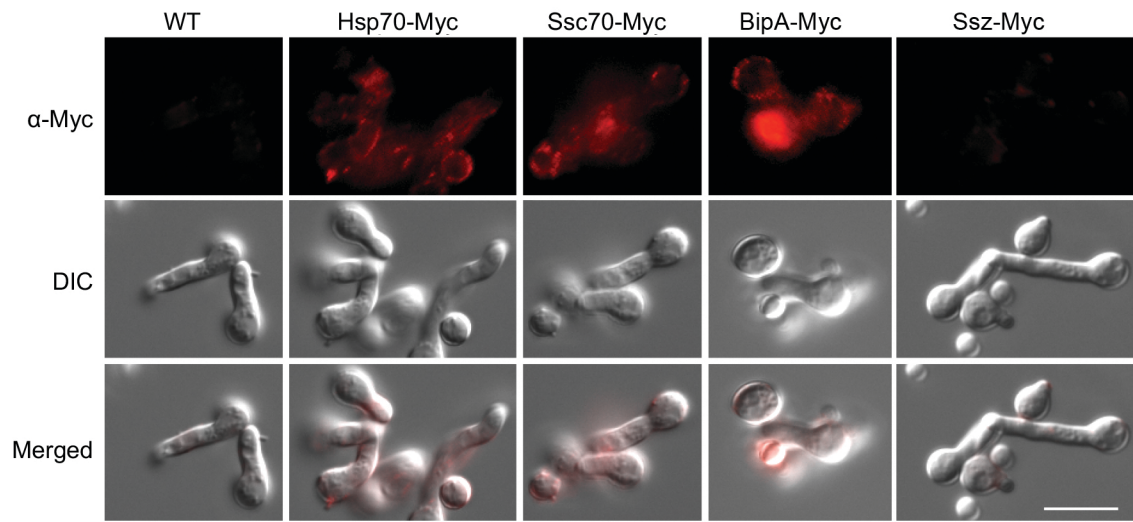

**A**

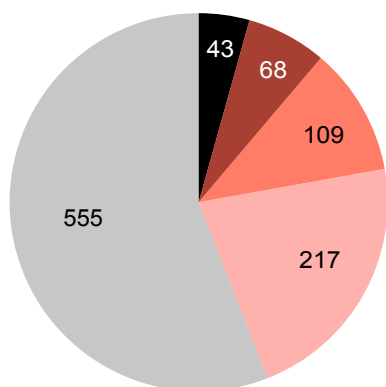

■ Found in 5 surfome analyses  
■ Found in 4 surfome analyses  
■ Found in 3 surfome analyses  
■ Found in 2 surfome analyses  
■ Found in 1 surfome analysis

**B**

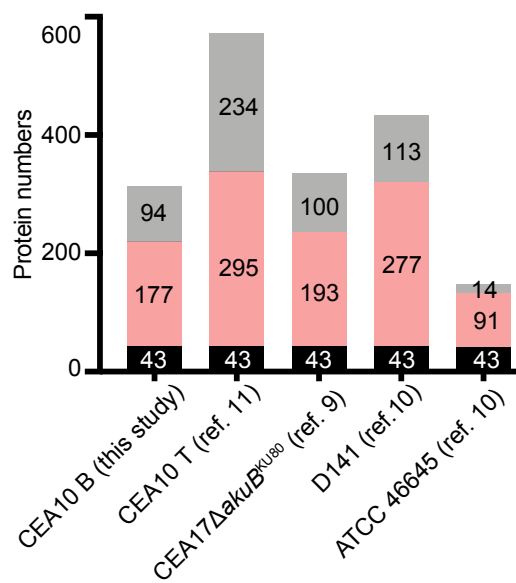

## Figure S1

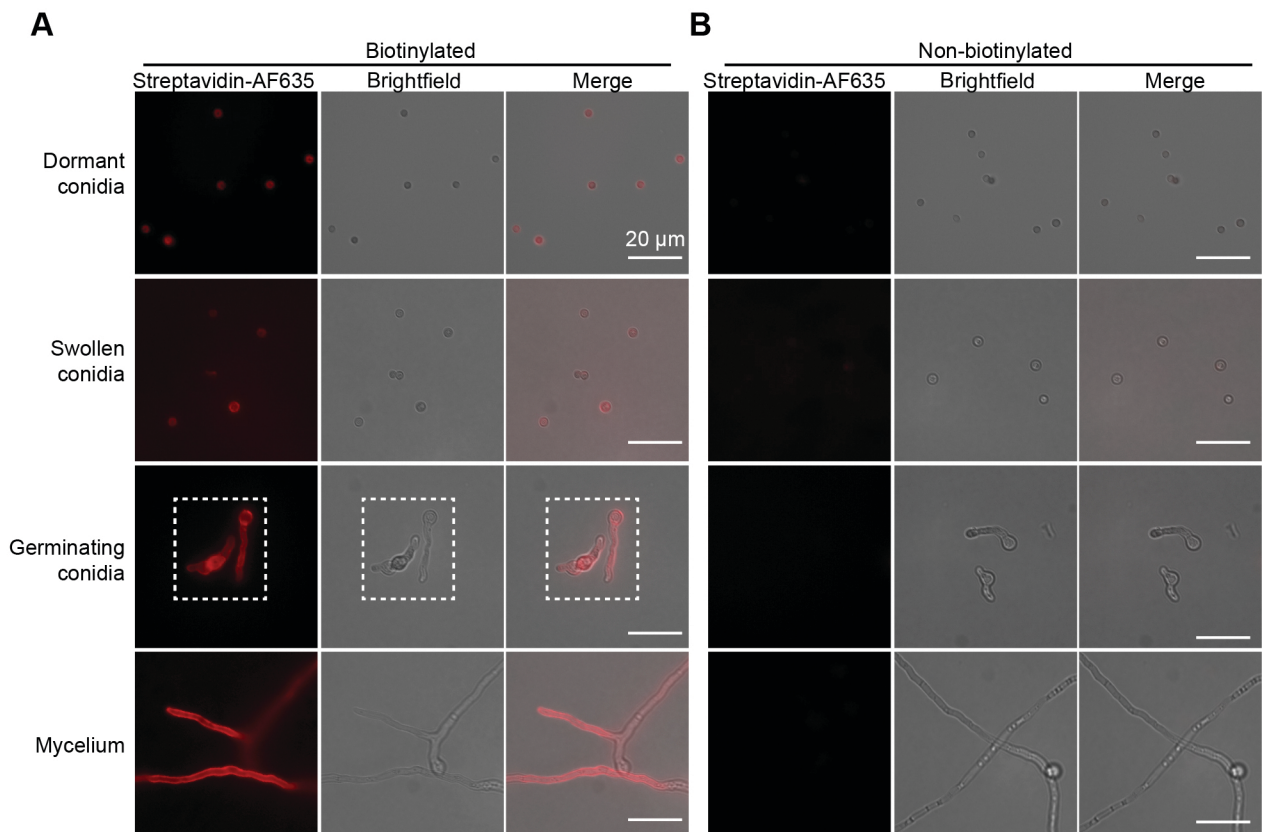



## Figure S3

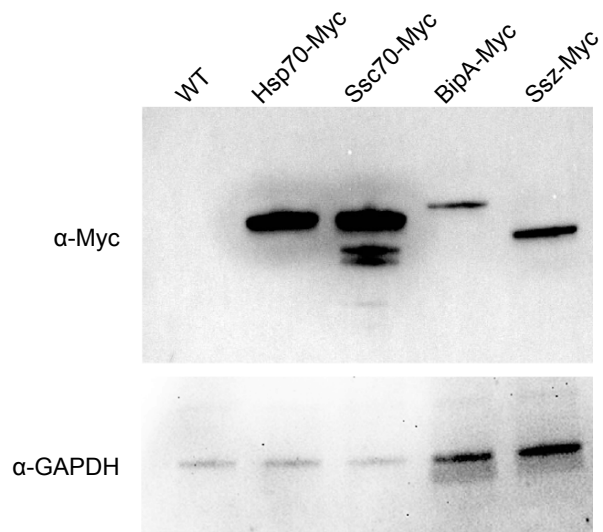

Figure S4

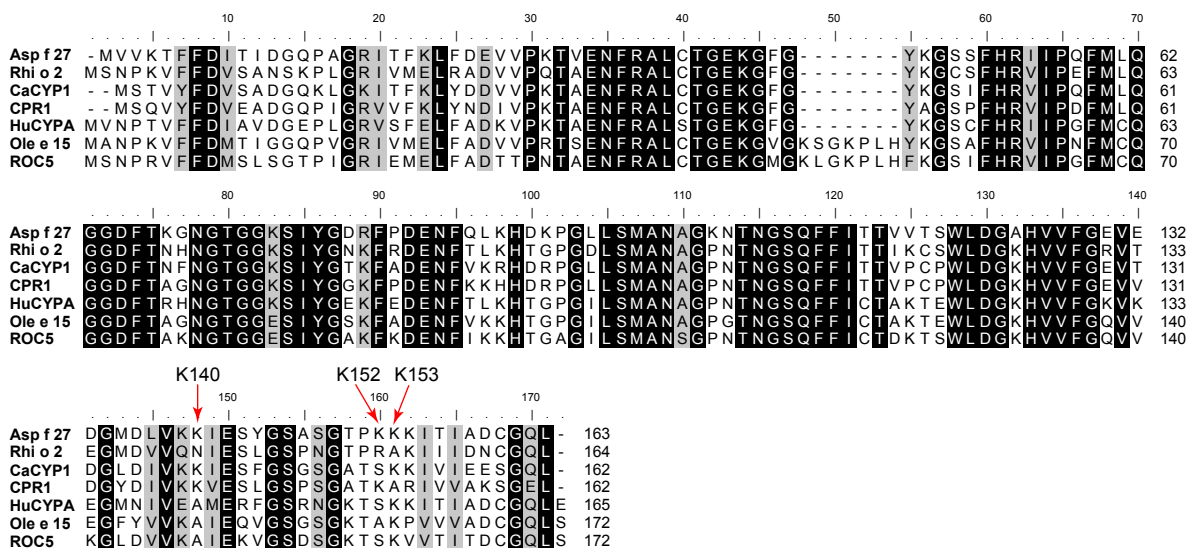

Source: https://www.biorxiv.org/content/biorxiv/early/2020/04/04/2020.04.03.021493.full.pdf
